# Supplementary material for: Fractal Analysis of the Optimal Hydraulic Gradient Surface in Water Distribution Networks
Source: Atypon-hosted journal article supplement (doi:10.1061/(asce)wr.1943-5452.0001608), 2022-11-03
Supplement: supplemental_materials_wr.1943-5452.0001608_jaramillo.pdf [file supplemental_materials_wr.1943-5452.0001608_jaramillo.pdf]

## SUPPLEMENTAL MATERIALS

*ASCE Journal of Water Resources Planning and Management*

# Fractal Analysis of the Optimal Hydraulic Gradient Surface in Water Distribution Networks

Andres Jaramillo and Juan Saldarriaga

**DOI:** 10.1061/(ASCE)WR.1943-5452.0001608

© ASCE 2022

[www.ascelibrary.org](http://www.ascelibrary.org)

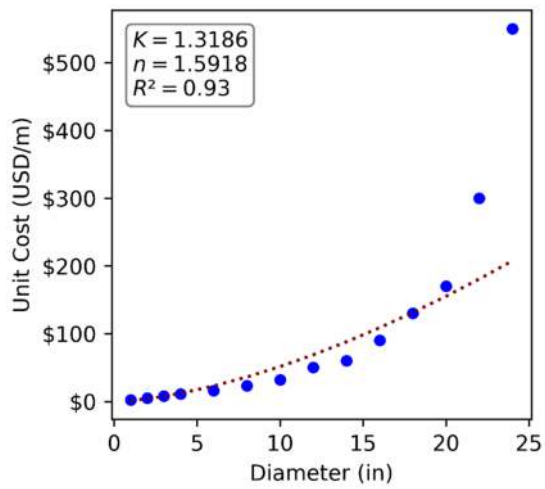

**Fig. S1.** Costs curve for Two Loops network

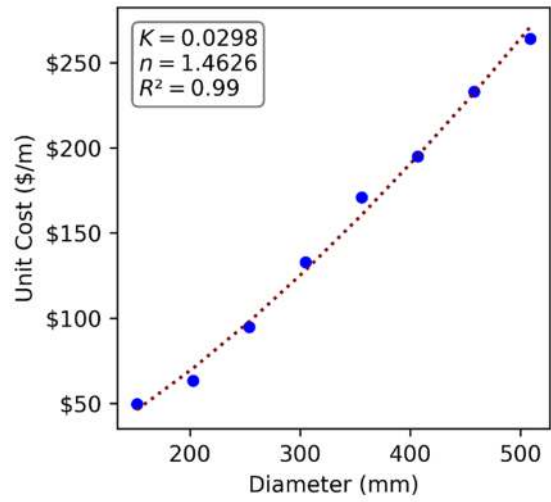

**Fig. S2.** Costs curve for Two Reservoirs network

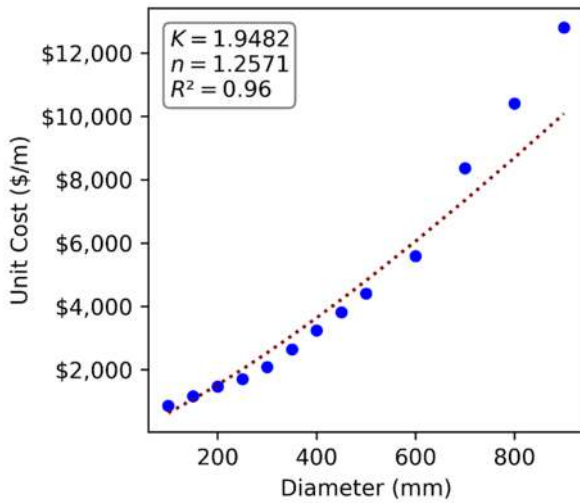

**Fig. S3.** Costs curve for Taichung network

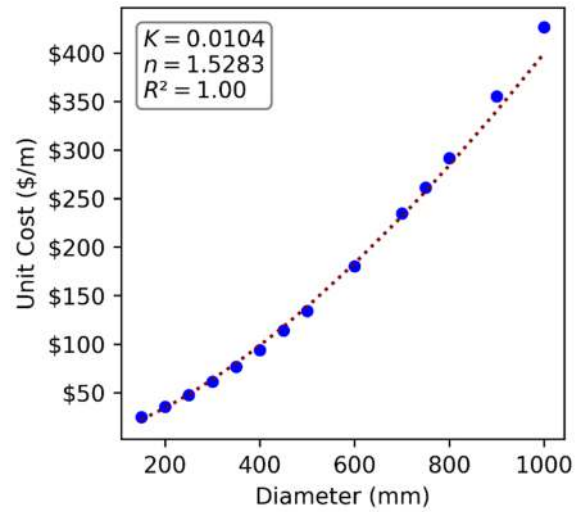

**Fig. S4.** Costs curve for Jilin network

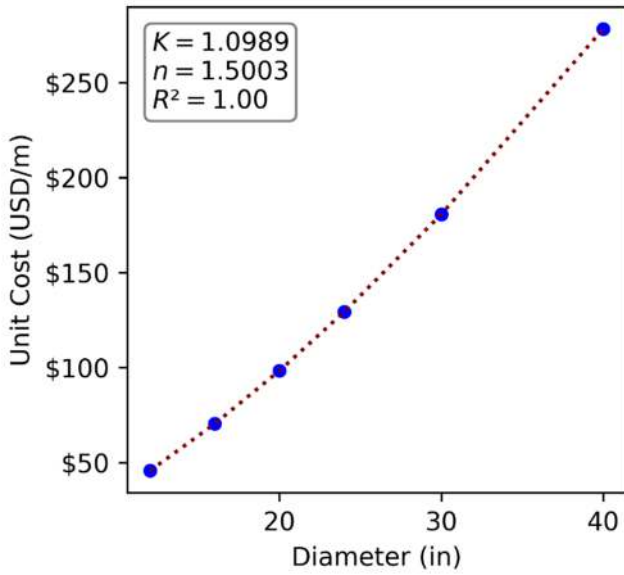

**Fig. S5.** Costs curve for Hanoi network

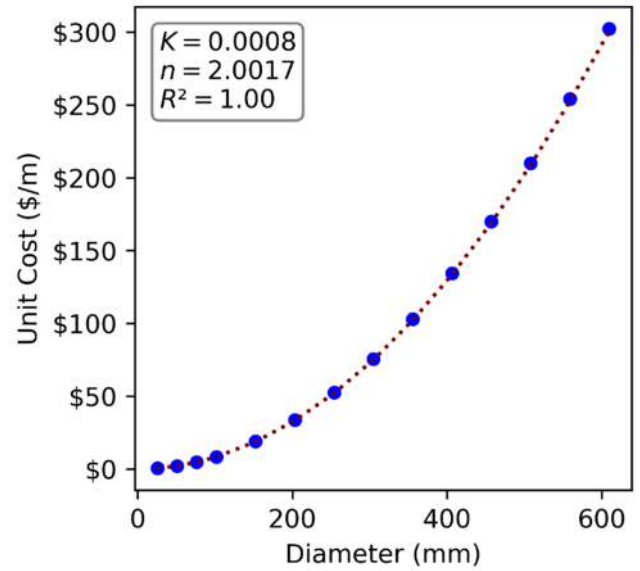

**Fig. S6.** Costs curve for Blacksburg network

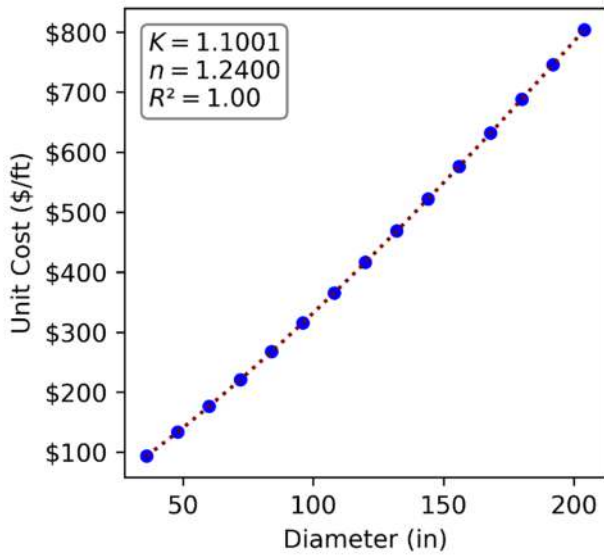

**Fig. S7.** Costs curve for New York Tunnels network

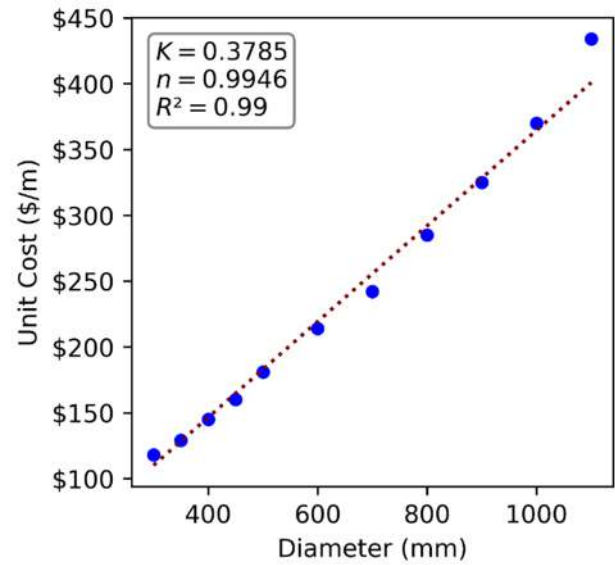

**Fig. S8.** Costs curve for BakRyan network

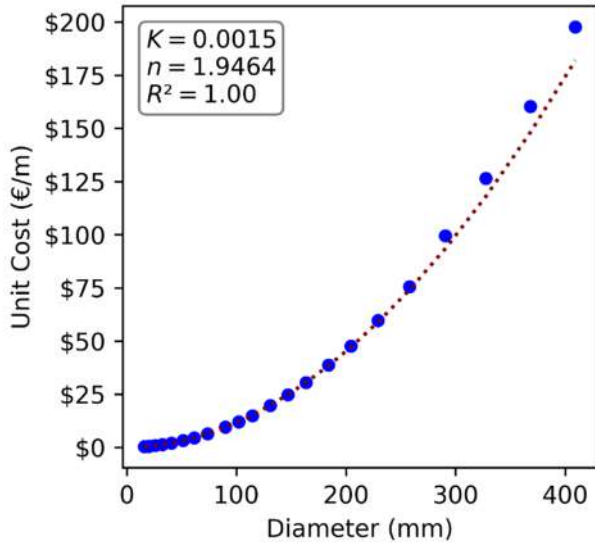

**Fig. S9.** Costs curve for Fossolo network

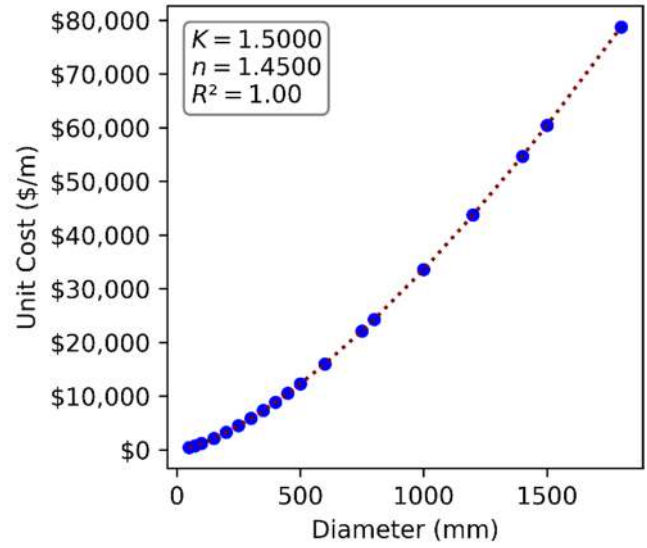

**Fig. S10.** Costs curve for R28 network

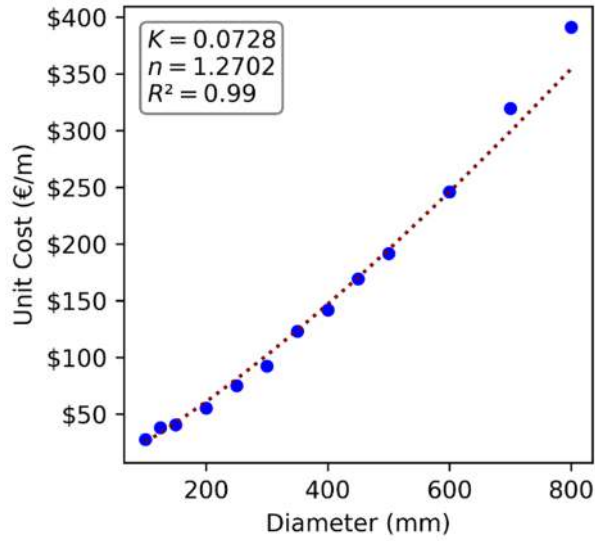

**Fig. S11.** Costs curve for Pescara network

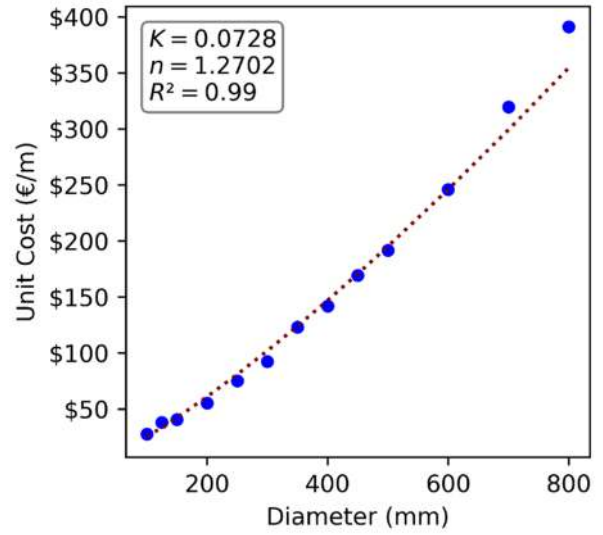

**Fig. S12.** Costs curve for Modena network

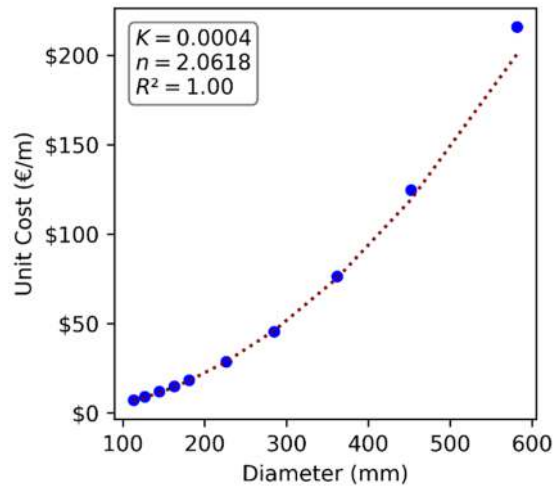

**Fig. S13.** Costs curve for Balerma network

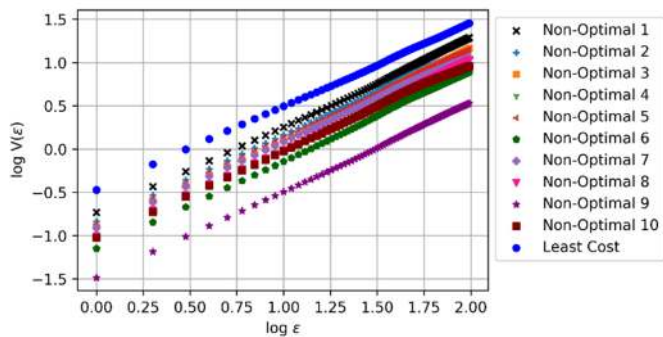

**Fig. S14.** Fractal analysis of the OHGS and non-optimal HGSs for Two Loops network

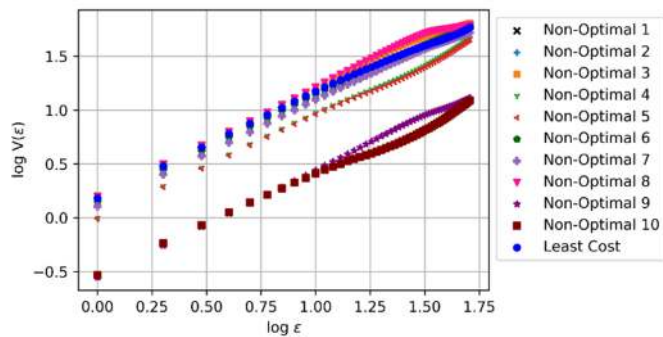

**Fig. S15.** Fractal analysis of the OHGS and non-optimal HGSs for Two Reservoirs network

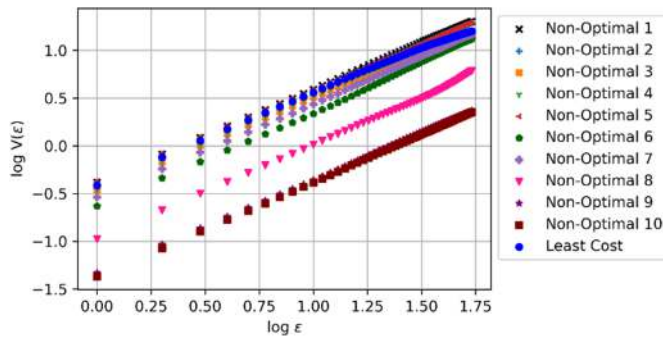

**Fig. S16.** Fractal analysis of the OHGS and non-optimal HGSs for Taichung network

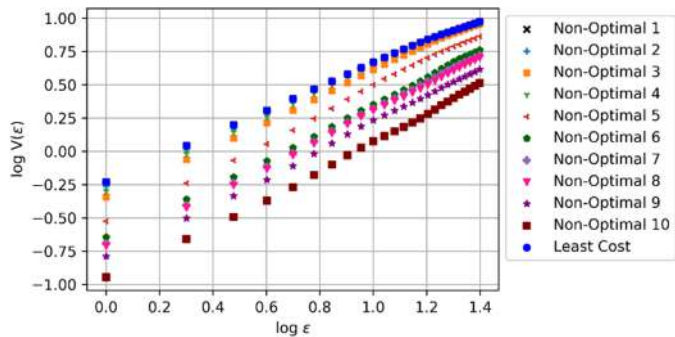

**Fig. S17.** Fractal analysis of the OHGS and non-optimal HGSs for Jilin network

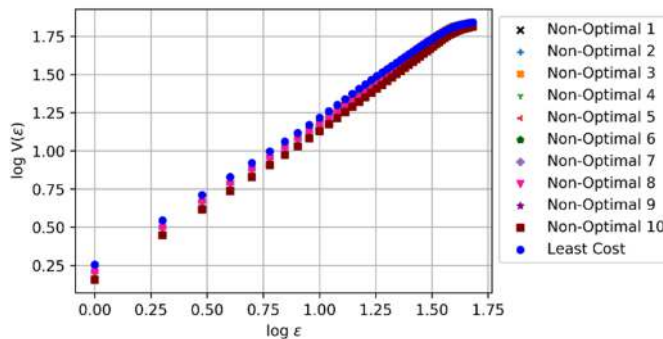

**Fig. S18.** Fractal analysis of the OHGS and non-optimal HGSs for Hanoi network

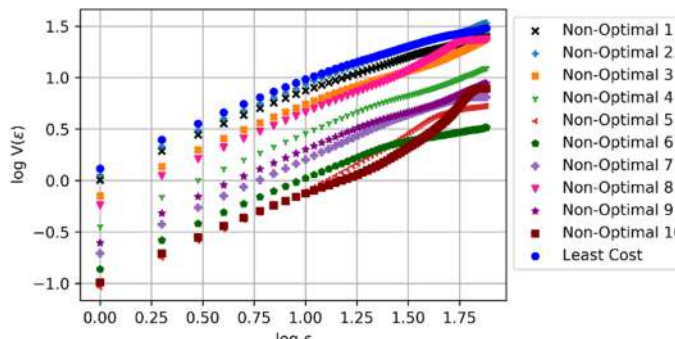

**Fig. S19.** Fractal analysis of the OHGS and non-optimal HGSs for Blacksburg network

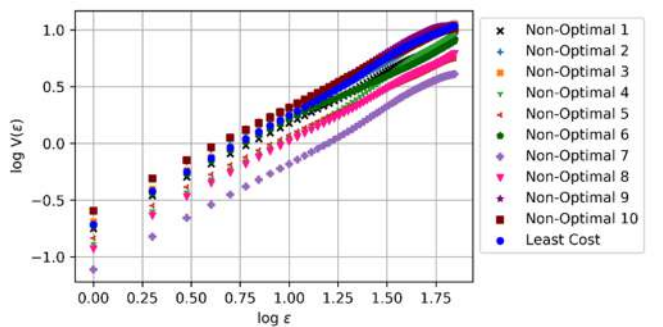

**Fig. S20.** Fractal analysis of the OHGS and non-optimal HGSs for New York Tunnels network

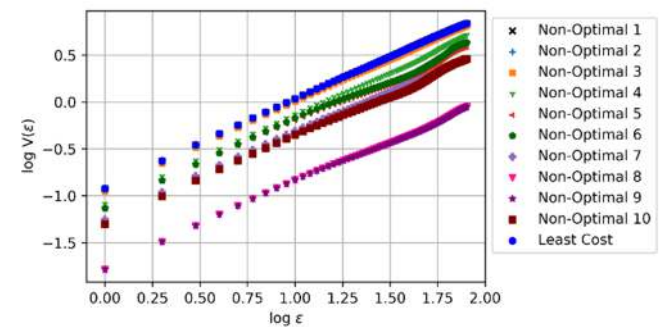

**Fig. S21.** Fractal analysis of the OHGS and non-optimal HGSs for BakRyann network

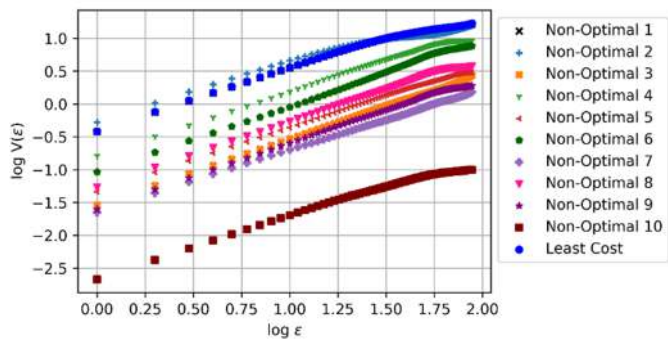

**Fig. S22.** Fractal analysis of the OHGS and non-optimal HGSs for Fossolo network

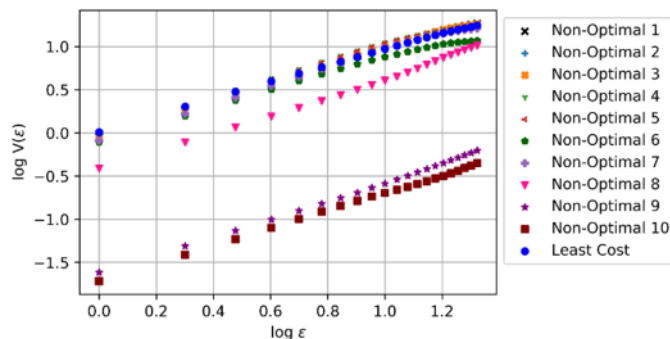

**Fig. S23.** Fractal analysis of the OHGS and non-optimal HGSs for R28 network

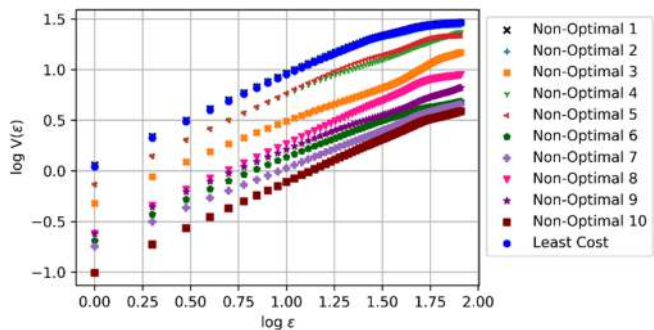

**Fig. S24.** Fractal analysis of the OHGS and non-optimal HGSs for Pescara network

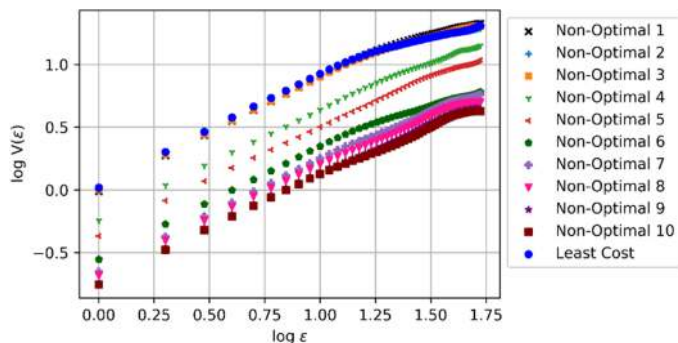

**Fig. S25.** Fractal analysis of the OHGS and non-optimal HGSs for Modena network

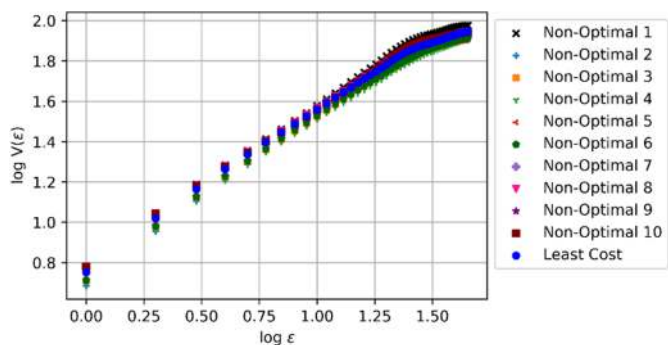

**Fig. S26.** Fractal analysis of the OHGS and non-optimal HGSs for Balerma network

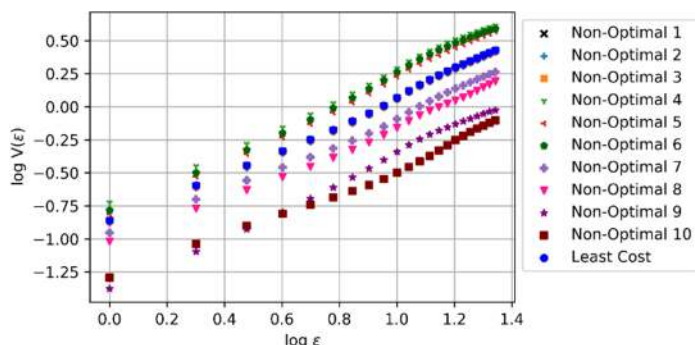

**Fig. S27.** Fractal analysis of the OHGS and non-optimal HGSs for La Uribe network

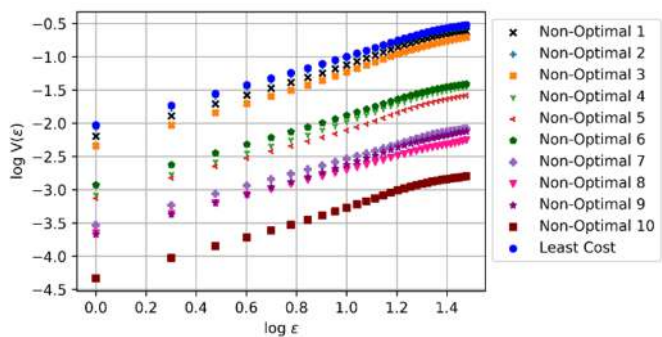

**Fig. S28.** Fractal analysis of the OHGS and the non-optimal HGSs for San Vicente network

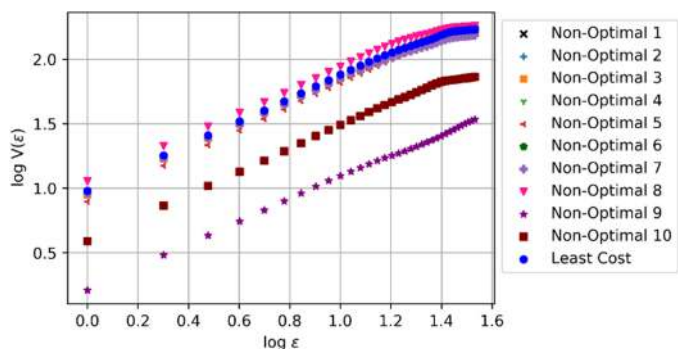

**Fig. S29.** Fractal analysis of the OHGS and the non-optimal HGSs for Cazucá network

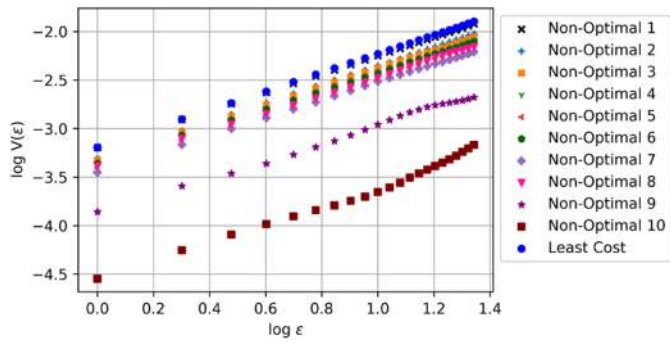

**Fig. S30.** Fractal analysis of the OHGS and the non-optimal HGSs for Elevada network

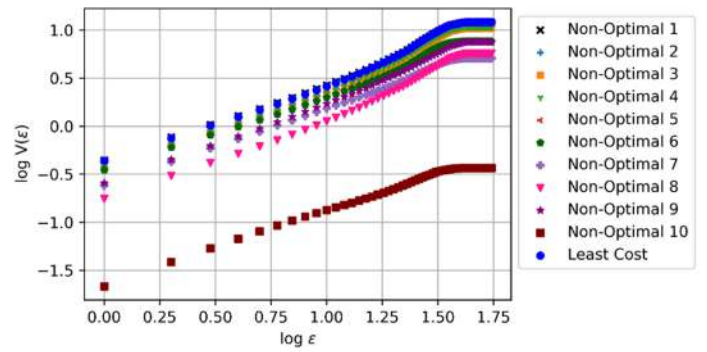

**Fig. S31.** Fractal analysis of the OHGS and the non-optimal HGSs for Andalucía Alta network

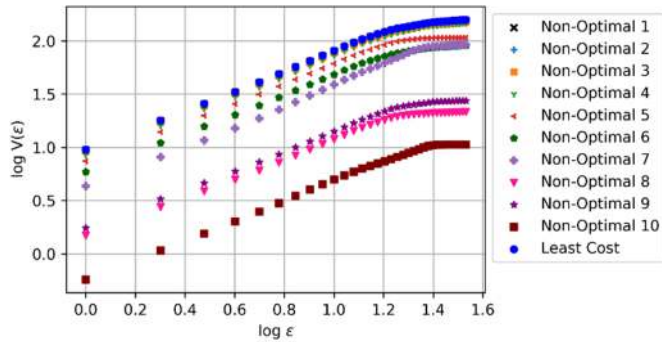

**Fig. S32.** Fractal analysis of the OHGS and the non-optimal HGSs for La Cumbre network

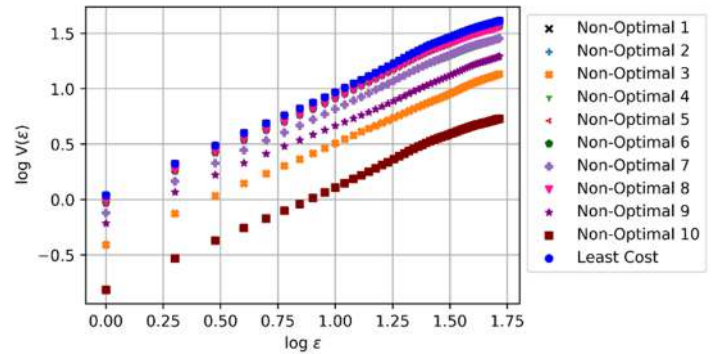

**Fig. S33.** Fractal analysis of the OHGS and the non-optimal HGSs for Andalucía Baja network

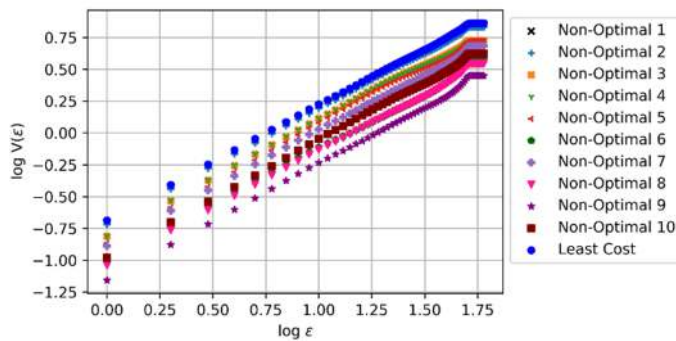

**Fig. S34.** Fractal analysis of the OHGS and the non-optimal HGSs for Toro network

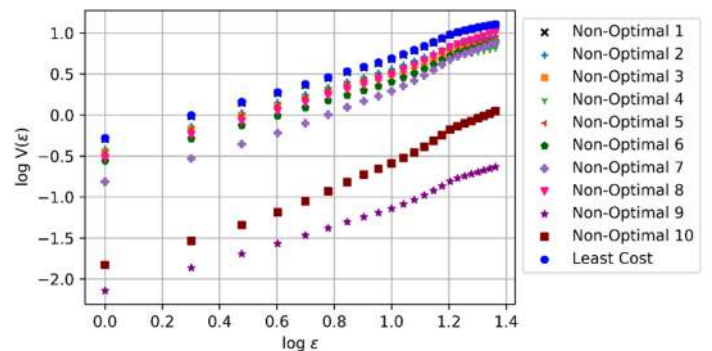

**Fig. S35.** Fractal analysis of the OHGS and the non-optimal HGSs for Candelaria network

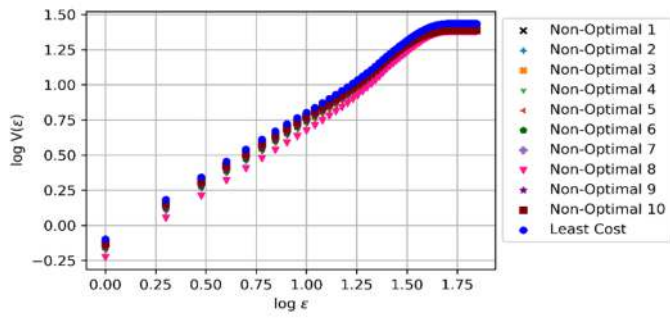

**Fig. S36.** Fractal analysis of the OHGS and the non-optimal HGSs for Bugalagrande network

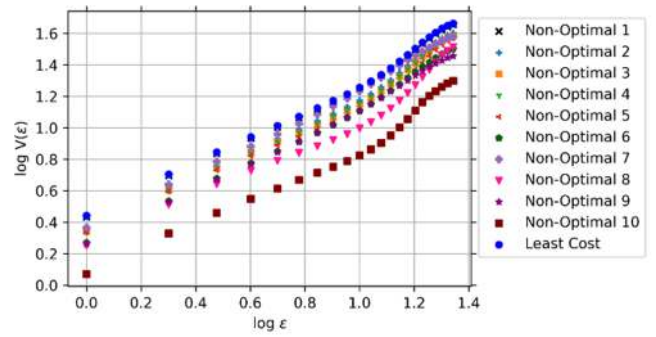

**Fig. S37.** Fractal analysis of the OHGS and the non-optimal HGSs for Carmen del Viboral network

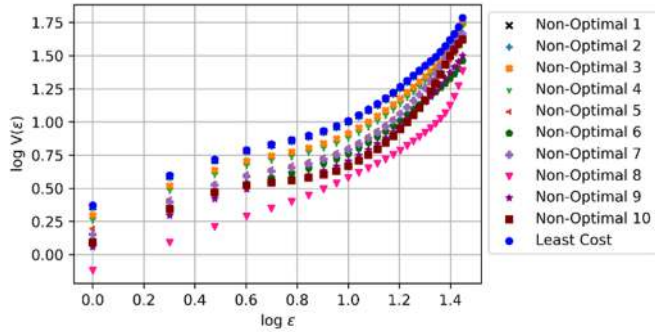

**Fig. S38.** Fractal analysis of the OHGS and the non-optimal HGSs for Morrорico Bajo network

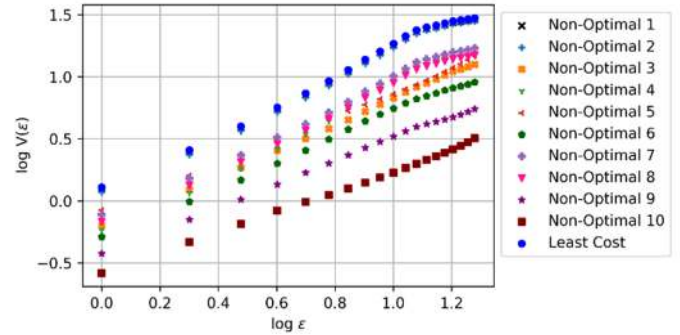

**Fig. S39.** Fractal analysis of the OHGS and the non-optimal HGSs for Chinú network

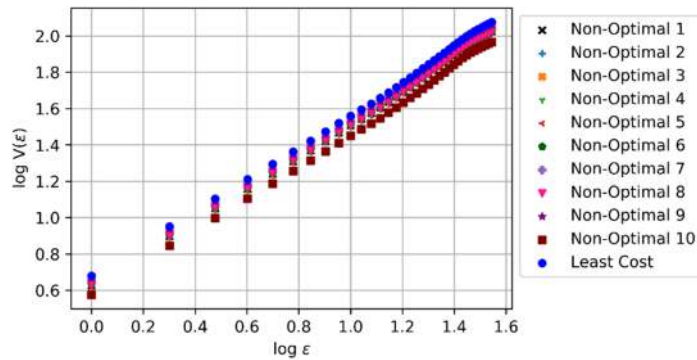

**Fig. S40.** Fractal analysis of the OHGS and the non-optimal HGSs for La Enea network



**Table S1.** Available pipe diameters and unit costs for Two Loops network

| Diameter (in) | Unit cost (\$/m) |
|---------------|------------------|
| 1             | 2                |
| 2             | 5                |
| 3             | 8                |
| 4             | 11               |
| 6             | 16               |
| 8             | 23               |
| 10            | 32               |
| 12            | 50               |
| 14            | 60               |
| 16            | 90               |
| 18            | 130              |
| 20            | 170              |
| 22            | 300              |
| 24            | 550              |

**Table S2.** Available pipe diameters and unit costs for Two Reservoirs network

| Diameter (mm) | Unit cost (\$/m) |
|---------------|------------------|
| 152           | 49.54            |
| 203           | 63.32            |
| 254           | 94.82            |
| 305           | 132.87           |
| 356           | 170.93           |
| 407           | 194.88           |
| 458           | 232.94           |
| 509           | 264.10           |

**Table S3.** Available pipe diameters and unit costs for Taichung network

| Diameter (mm) | Unit cost (\$/m) |
|---------------|------------------|
| 100           | 860              |
| 150           | 1,160            |
| 200           | 1,470            |
| 250           | 1,700            |
| 300           | 2,080            |
| 350           | 2,640            |
| 400           | 3,240            |
| 450           | 3,810            |
| 500           | 4,400            |
| 600           | 5,580            |
| 700           | 8,360            |
| 800           | 10,400           |
| 900           | 12,800           |

**Table S4.** Available pipe diameters and unit costs for Jilin network

| Diameter (mm) | Unit cost (\$/m) |
|---------------|------------------|
| 150           | 24.5             |
| 200           | 35.2             |
| 250           | 47.4             |
| 300           | 61.2             |
| 350           | 76.5             |
| 400           | 93.6             |
| 450           | 113.8            |
| 500           | 134.0            |
| 600           | 180.2            |
| 700           | 234.7            |
| 750           | 261.2            |
| 800           | 291.7            |
| 900           | 355.3            |
| 1000          | 426.7            |

**Table S5.** Available pipe diameters and unit costs for Hanoi network

| Diameter (in) | Unit cost (\$/m) |
|---------------|------------------|
| 12            | 45.70            |
| 16            | 70.40            |
| 20            | 98.40            |
| 24            | 129.30           |
| 30            | 180.70           |
| 40            | 278.30           |

**Table S6.** Available pipe diameters and unit costs for Blacksburg network

| Diameter (mm) | Unit cost (\$/m) |
|---------------|------------------|
| 25.4          | 0.52             |
| 50.8          | 2.10             |
| 76.2          | 4.72             |
| 101.6         | 8.40             |
| 152.4         | 18.90            |
| 203.2         | 33.60            |
| 254.0         | 52.50            |
| 304.8         | 75.59            |
| 355.6         | 102.89           |
| 406.4         | 134.39           |
| 457.2         | 170.09           |
| 508.0         | 209.98           |
| 558.8         | 254.08           |
| 609.6         | 302.37           |

**Table S7.** Available pipe diameters and unit costs for New York Tunnels network

| Diameter (in) | Unit cost (\$/ft) |
|---------------|-------------------|
| 36            | 93.59             |
| 48            | 133.70            |
| 60            | 176.32            |
| 72            | 221.05            |
| 84            | 267.61            |
| 96            | 315.80            |
| 108           | 365.46            |
| 120           | 416.46            |
| 132           | 468.71            |
| 144           | 522.11            |
| 156           | 576.59            |
| 168           | 632.09            |
| 180           | 688.54            |
| 192           | 745.91            |
| 204           | 804.14            |

**Table S8.** Available pipe diameters and unit costs for BakRyan network

| Diameter (mm) | Unit cost (\$/m) |
|---------------|------------------|
| 300           | 118              |
| 350           | 129              |
| 400           | 145              |
| 450           | 160              |
| 500           | 181              |
| 600           | 214              |
| 700           | 242              |
| 800           | 285              |
| 900           | 325              |
| 1000          | 370              |
| 1100          | 434              |

**Table S9.** Available pipe diameters and unit costs for Fossolo network

| Diameter (mm) | Unit cost (€/m) |
|---------------|-----------------|
| 16.0          | 0.38            |
| 20.4          | 0.56            |
| 26.0          | 0.88            |
| 32.6          | 1.35            |
| 40.8          | 2.02            |
| 51.4          | 3.21            |
| 61.4          | 4.44            |
| 73.6          | 6.45            |
| 90.0          | 9.59            |
| 102.2         | 11.98           |
| 114.6         | 14.93           |
| 130.8         | 19.61           |
| 147.2         | 24.78           |
| 163.6         | 30.55           |
| 184.0         | 38.71           |
| 204.6         | 47.63           |
| 229.2         | 59.70           |
| 257.8         | 75.61           |
| 290.6         | 99.58           |
| 327.4         | 126.48          |
| 368.2         | 160.29          |
| 409.2         | 197.71          |

**Table S10.** Available pipe diameters and unit costs for R28 network

| Diameter (mm) | Unit cost (\$/m) |
|---------------|------------------|
| 50            | 436.11           |
| 75            | 785.11           |
| 100           | 1,191.49         |
| 150           | 2,144.98         |
| 200           | 3,255.25         |
| 250           | 4,498.88         |
| 300           | 5,860.26         |
| 350           | 7,328.08         |
| 400           | 8,893.61         |
| 450           | 10,549.93        |
| 500           | 12,291.30        |
| 600           | 16,010.71        |
| 750           | 22,127.38        |
| 800           | 24,298.07        |
| 1000          | 33,580.82        |
| 1200          | 43,742.55        |
| 1400          | 54,698.69        |
| 1500          | 60,453.80        |
| 1800          | 78,747.43        |

**Table S11.** Available pipe diameters and unit costs for Pescara network

| Diameter (mm) | Unit cost (€/m) |
|---------------|-----------------|
| 100           | 27.7            |
| 125           | 38.0            |
| 150           | 40.5            |
| 200           | 55.4            |
| 250           | 75.0            |
| 300           | 92.4            |
| 350           | 123.1           |
| 400           | 141.9           |
| 450           | 169.3           |
| 500           | 191.5           |
| 600           | 246.0           |
| 700           | 319.6           |
| 800           | 391.1           |

**Table S12.** Available pipe diameters and unit costs for Modena network

| Diameter (mm) | Unit cost (€/m) |
|---------------|-----------------|
| 100           | 27.7            |
| 125           | 38.0            |
| 150           | 40.5            |
| 200           | 55.4            |
| 250           | 75.0            |
| 300           | 92.4            |
| 350           | 123.1           |
| 400           | 141.9           |
| 450           | 169.3           |
| 500           | 191.5           |
| 600           | 246.0           |
| 700           | 319.6           |
| 800           | 391.1           |

**Table S13.** Available pipe diameters and unit costs for Balerma network

| Diameter (mm) | Unit cost (€/m) |
|---------------|-----------------|
| 113.0         | 7.22            |
| 126.6         | 9.10            |
| 144.6         | 11.92           |
| 162.8         | 14.84           |
| 180.8         | 18.38           |
| 226.2         | 28.60           |
| 285.0         | 45.39           |
| 361.8         | 76.32           |
| 452.2         | 124.64          |
| 581.8         | 215.85          |

**Table S14.** Available pipe diameters and unit costs for Colombian networks

| Diameter (mm) | Unit cost (\$/m) |
|---------------|------------------|
| 76.2          | 22,399           |
| 101.6         | 36,956           |
| 152.4         | 80,695           |
| 203.2         | 136,687          |
| 254.0         | 215,173          |
| 304.8         | 301,068          |
| 355.6         | 373,361          |
| 406.4         | 490,042          |
| 457.2         | 628,961          |
| 508.0         | 783,442          |
| 609.6         | 1,071,610        |
| 762.0         | 1,625,537        |
| 914.4         | 2,284,821        |

**Table S15.** Final capital costs for optimal and non-optimal designs – Part 1

| ID | LC               | NO1              | NO2              | NO3              |
|----|------------------|------------------|------------------|------------------|
| 1  | \$ 473 454       | \$ 509 028       | \$ 558 118       | \$ 657 946       |
| 2  | \$ 2 660 295     | \$ 2 760 730     | \$ 2 799 956     | \$ 2 844 058     |
| 3  | \$ 8 012 279     | \$ 8 237 353     | \$ 8 290 487     | \$ 8 722 998     |
| 4  | \$ 3 850 343     | \$ 3 859 162     | \$ 3 870 689     | \$ 4 754 272     |
| 5  | \$ 5 450 826     | \$ 5 465 789     | \$ 5 483 381     | \$ 5 499 352     |
| 6  | \$ 72 415        | \$ 100 649       | \$ 163 955       | \$ 407 386       |
| 7  | \$ 186 664 061   | \$ 245 245 457   | \$ 269 465 853   | \$ 278 550 286   |
| 8  | \$ 3 282 357     | \$ 3 285 259     | \$ 3 332 271     | \$ 3 424 860     |
| 9  | \$ 28 289        | \$ 28 314        | \$ 61 669        | \$ 98 508        |
| 10 | \$ 11 850 492    | \$ 14 404 837    | \$ 15 509 164    | \$ 16 139 028    |
| 11 | \$ 2 240 366     | \$ 2 304 558     | \$ 2 780 837     | \$ 3 780 542     |
| 12 | \$ 2 788 380     | \$ 3 086 318     | \$ 3 100 256     | \$ 5 213 384     |
| 13 | \$ 3 827 838     | \$ 3 887 845     | \$ 3 894 302     | \$ 4 097 886     |
| 14 | \$ 194 473 008   | \$ 195 061 558   | \$ 216 788 204   | \$ 233 048 999   |
| 15 | \$ 248 100 324   | \$ 248 396 475   | \$ 275 567 519   | \$ 365 431 125   |
| 16 | \$ 642 925 277   | \$ 645 112 904   | \$ 679 427 542   | \$ 929 690 069   |
| 17 | \$ 800 303 579   | \$ 818 061 977   | \$ 830 553 311   | \$ 841 682 754   |
| 18 | \$ 2 339 164     | \$ 2 773 417     | \$ 3 766 411     | \$ 4 009 546     |
| 19 | \$ 586 074 840   | \$ 595 967 859   | \$ 607 448 977   | \$ 771 759 465   |
| 20 | \$ 738 147 083   | \$ 751 628 024   | \$ 811 347 605   | \$ 860 723 755   |
| 21 | \$ 1 116 510 119 | \$ 1 142 760 927 | \$ 1 252 496 651 | \$ 1 954 879 503 |
| 22 | \$ 815 700 571   | \$ 830 890 364   | \$ 835 184 638   | \$ 1 173 393 576 |
| 23 | \$ 540 909 236   | \$ 556 148 120   | \$ 650 198 279   | \$ 712 538 057   |
| 24 | \$ 769 163 736   | \$ 844 728 547   | \$ 860 499 929   | \$ 982 141 517   |
| 25 | \$ 1 211 819 035 | \$ 1 241 732 469 | \$ 1 952 327 502 | \$ 2 177 864 692 |
| 26 | \$ 558 375 169   | \$ 572 074 445   | \$ 586 316 280   | \$ 750 223 980   |
| 27 | \$ 1 212 896 088 | \$ 1 248 840 597 | \$ 1 465 424 984 | \$ 2 340 370 413 |
| 28 | \$ 1 147 798 861 | \$ 1 171 843 364 | \$ 1 274 357 991 | \$ 1 805 123 698 |

Note: ID = Network Identification; LC = Least Cost; NO = Non-Optimal.

**Table S16.** Final capital costs for optimal and non-optimal designs - Part 2

| ID | NO4              | NO5              | NO6              | NO7              |
|----|------------------|------------------|------------------|------------------|
| 1  | \$ 747 265       | \$ 775 516       | \$ 795 197       | \$ 894 677       |
| 2  | \$ 2 927 387     | \$ 3 010 715     | \$ 3 094 044     | \$ 3 204 421     |
| 3  | \$ 9 309 206     | \$ 10 945 270    | \$ 11 371 988    | \$ 11 751 466    |
| 4  | \$ 5 936 031     | \$ 6 551 959     | \$ 7 257 191     | \$ 7 339 981     |
| 5  | \$ 5 592 032     | \$ 5 656 896     | \$ 5 678 925     | \$ 5 734 965     |
| 6  | \$ 585 557       | \$ 613 505       | \$ 675 388       | \$ 699 519       |
| 7  | \$ 298 510 518   | \$ 299 240 246   | \$ 302 960 049   | \$ 304 885 282   |
| 8  | \$ 4 387 418     | \$ 4 974 782     | \$ 5 820 732     | \$ 5 855 443     |
| 9  | \$ 246 090       | \$ 274 103       | \$ 304 946       | \$ 305 754       |
| 10 | \$ 17 367 221    | \$ 21 513 372    | \$ 22 964 540    | \$ 26 214 739    |
| 11 | \$ 4 509 438     | \$ 6 178 304     | \$ 6 711 434     | \$ 6 888 787     |
| 12 | \$ 7 485 296     | \$ 9 441 364     | \$ 9 697 618     | \$ 10 448 763    |
| 13 | \$ 4 126 806     | \$ 4 201 584     | \$ 4 316 870     | \$ 4 335 743     |
| 14 | \$ 270 707 192   | \$ 280 728 896   | \$ 294 810 246   | \$ 325 681 325   |
| 15 | \$ 407 768 104   | \$ 433 323 536   | \$ 503 546 181   | \$ 513 826 215   |
| 16 | \$ 1 610 959 560 | \$ 1 740 480 293 | \$ 1 949 671 685 | \$ 2 626 655 012 |
| 17 | \$ 857 417 822   | \$ 866 581 662   | \$ 1 041 969 697 | \$ 1 099 744 938 |
| 18 | \$ 4 418 666     | \$ 4 566 534     | \$ 5 030 594     | \$ 5 204 100     |
| 19 | \$ 820 193 277   | \$ 846 477 682   | \$ 1 082 167 508 | \$ 1 149 936 506 |
| 20 | \$ 960 910 845   | \$ 1 309 651 860 | \$ 1 429 142 965 | \$ 6 274 492 101 |
| 21 | \$ 2 022 322 054 | \$ 2 122 322 841 | \$ 2 234 543 479 | \$ 2 269 232 700 |
| 22 | \$ 1 360 870 614 | \$ 1 639 003 136 | \$ 1 678 996 204 | \$ 1 827 025 598 |
| 23 | \$ 799 204 730   | \$ 848 142 176   | \$ 1 079 000 460 | \$ 1 112 598 673 |
| 24 | \$ 1 044 275 843 | \$ 1 108 145 044 | \$ 1 496 477 722 | \$ 1 525 921 096 |
| 25 | \$ 3 005 792 791 | \$ 4 341 917 034 | \$ 5 069 618 210 | \$ 9 851 160 607 |
| 26 | \$ 816 948 296   | \$ 1 010 354 610 | \$ 1 141 362 090 | \$ 1 254 123 970 |
| 27 | \$ 2 598 209 385 | \$ 2 644 122 079 | \$ 2 730 773 842 | \$ 3 330 306 365 |
| 28 | \$ 1 961 178 043 | \$ 1 982 463 213 | \$ 2 042 717 385 | \$ 2 109 422 395 |

Note: ID = Network Identification; NO = Non-Optimal.

**Table S17.** Final capital costs for optimal and non-optimal designs - Part 3

| ID | NO8               | NO9               | NO10              |
|----|-------------------|-------------------|-------------------|
| 1  | \$ 916 046        | \$ 955 073        | \$ 972 550        |
| 2  | \$ 3 475 829      | \$ 5 282 559      | \$ 5 618 376      |
| 3  | \$ 21 706 110     | \$ 23 357 110     | \$ 24 694 676     |
| 4  | \$ 8 073 459      | \$ 9 656 401      | \$ 10 461 714     |
| 5  | \$ 5 780 952      | \$ 5 854 241      | \$ 5 892 952      |
| 6  | \$ 755 567        | \$ 761 986        | \$ 825 930        |
| 7  | \$ 307 102 053    | \$ 307 274 825    | \$ 311 957 255    |
| 8  | \$ 6 092 993      | \$ 6 123 209      | \$ 6 363 273      |
| 9  | \$ 442 787        | \$ 452 820        | \$ 626 555        |
| 10 | \$ 96 667 872     | \$ 136 118 745    | \$ 166 880 017    |
| 11 | \$ 7 302 508      | \$ 7 659 601      | \$ 10 753 716     |
| 12 | \$ 10 838 406     | \$ 11 658 015     | \$ 12 244 503     |
| 13 | \$ 4 518 129      | \$ 4 634 857      | \$ 4 721 904      |
| 14 | \$ 378 842 468    | \$ 2 292 230 122  | \$ 3 559 998 411  |
| 15 | \$ 3 077 803 770  | \$ 4 186 591 577  | \$ 4 491 099 650  |
| 16 | \$ 3 833 701 905  | \$ 3 943 889 826  | \$ 5 288 325 653  |
| 17 | \$ 1 114 821 332  | \$ 7 672 780 884  | \$ 7 930 642 955  |
| 18 | \$ 5 289 509      | \$ 48 595 179     | \$ 54 986 830     |
| 19 | \$ 1 169 658 462  | \$ 1 333 940 369  | \$ 13 917 988 694 |
| 20 | \$ 7 865 580 700  | \$ 8 119 737 327  | \$ 14 196 587 235 |
| 21 | \$ 3 813 205 709  | \$ 5 132 807 667  | \$ 25 384 024 734 |
| 22 | \$ 2 584 058 160  | \$ 3 796 220 689  | \$ 5 651 909 421  |
| 23 | \$ 1 205 906 547  | \$ 12 271 721 275 | \$ 12 512 837 676 |
| 24 | \$ 1 710 334 414  | \$ 5 092 590 304  | \$ 5 933 763 364  |
| 25 | \$ 10 299 198 324 | \$ 14 209 985 408 | \$ 17 299 065 474 |
| 26 | \$ 1 733 419 147  | \$ 2 704 427 681  | \$ 3 667 920 384  |
| 27 | \$ 7 083 966 573  | \$ 19 337 763 588 | \$ 24 950 671 357 |
| 28 | \$ 2 123 462 512  | \$ 2 141 143 745  | \$ 2 200 930 478  |

Note: ID = Network Identification; NO = Non-Optimal.



**Table S18.** Mean diameter values for each design

| ID | Mean (mm) |         |         |         |         |         |         |         |         |         |         |
|----|-----------|---------|---------|---------|---------|---------|---------|---------|---------|---------|---------|
|    | LC        | NO1     | NO2     | NO3     | NO4     | NO5     | NO6     | NO7     | NO8     | NO9     | NO10    |
| 1  | 260.35    | 269.88  | 288.93  | 323.85  | 342.90  | 361.95  | 371.48  | 400.05  | 400.05  | 419.10  | 403.23  |
| 2  | 170.00    | 176.00  | 179.00  | 182.00  | 188.00  | 194.00  | 194.00  | 197.00  | 209.00  | 257.00  | 329.00  |
| 3  | 156.45    | 154.84  | 154.84  | 164.52  | 172.58  | 190.32  | 204.84  | 201.61  | 380.65  | 398.39  | 419.35  |
| 4  | 404.41    | 405.88  | 407.35  | 510.29  | 598.53  | 650.00  | 700.00  | 711.76  | 770.59  | 888.24  | 930.88  |
| 5  | 600.64    | 603.62  | 606.61  | 629.02  | 636.49  | 630.52  | 648.45  | 635.00  | 643.96  | 643.96  | 652.93  |
| 6  | 95.79     | 95.79   | 122.65  | 212.63  | 263.43  | 330.93  | 291.74  | 325.12  | 325.85  | 330.93  | 335.28  |
| 7  | 2111.83   | 2452.91 | 2641.60 | 2764.97 | 2997.20 | 3048.00 | 3033.49 | 3171.37 | 3077.03 | 3055.26 | 3011.71 |
| 8  | 376.72    | 378.45  | 385.34  | 393.97  | 503.45  | 544.83  | 658.62  | 652.59  | 671.55  | 700.86  | 701.72  |
| 9  | 49.13     | 49.23   | 69.56   | 100.00  | 142.24  | 143.73  | 151.02  | 142.51  | 181.49  | 188.33  | 223.42  |
| 10 | 91.04     | 102.99  | 108.96  | 113.81  | 115.67  | 127.61  | 142.54  | 150.00  | 357.46  | 495.90  | 561.57  |
| 11 | 166.67    | 168.43  | 178.79  | 242.93  | 290.91  | 391.67  | 368.43  | 377.78  | 385.10  | 386.62  | 480.81  |
| 12 | 139.43    | 140.46  | 141.32  | 219.32  | 285.25  | 365.77  | 367.19  | 392.74  | 411.67  | 431.31  | 448.66  |
| 13 | 179.03    | 187.63  | 182.11  | 189.74  | 184.52  | 185.84  | 187.53  | 199.79  | 205.38  | 202.38  | 203.74  |
| 14 | 76.72     | 79.83   | 89.16   | 93.82   | 104.19  | 97.97   | 116.63  | 99.53   | 118.19  | 356.64  | 395.00  |
| 15 | 83.78     | 84.16   | 90.61   | 109.18  | 109.18  | 113.73  | 113.73  | 114.87  | 321.10  | 368.87  | 375.31  |
| 16 | 80.49     | 83.71   | 111.62  | 373.13  | 429.65  | 402.11  | 368.12  | 374.20  | 402.11  | 459.70  | 387.08  |
| 17 | 120.40    | 121.92  | 122.77  | 123.44  | 125.31  | 126.32  | 129.71  | 134.28  | 134.96  | 385.74  | 411.82  |
| 18 | 76.20     | 84.60   | 95.90   | 104.59  | 107.78  | 109.23  | 110.97  | 110.20  | 111.55  | 366.51  | 378.78  |
| 19 | 76.27     | 77.19   | 78.74   | 91.16   | 96.59   | 97.37   | 103.43  | 110.07  | 111.76  | 116.28  | 393.84  |
| 20 | 79.29     | 80.23   | 84.60   | 90.18   | 95.28   | 114.64  | 117.46  | 226.45  | 226.25  | 228.33  | 378.58  |
| 21 | 79.87     | 81.04   | 85.42   | 108.50  | 107.34  | 112.56  | 112.56  | 114.11  | 144.34  | 159.94  | 388.61  |
| 22 | 77.52     | 78.36   | 78.84   | 91.51   | 105.92  | 111.69  | 112.95  | 112.41  | 125.44  | 149.52  | 143.69  |
| 23 | 79.83     | 81.08   | 86.14   | 91.39   | 95.55   | 102.90  | 110.87  | 114.10  | 113.34  | 372.85  | 357.12  |
| 24 | 78.49     | 82.21   | 83.18   | 88.53   | 90.94   | 93.34   | 112.15  | 113.35  | 116.61  | 186.45  | 191.26  |
| 25 | 81.26     | 82.56   | 103.59  | 109.02  | 120.75  | 134.98  | 141.97  | 207.29  | 203.31  | 242.35  | 299.46  |
| 26 | 76.47     | 77.73   | 78.83   | 88.67   | 92.23   | 105.47  | 113.00  | 116.20  | 120.93  | 163.20  | 175.40  |
| 27 | 76.22     | 77.44   | 82.80   | 103.51  | 112.03  | 111.54  | 112.59  | 121.33  | 157.20  | 273.85  | 320.22  |
| 28 | 78.29     | 79.25   | 81.69   | 93.30   | 98.15   | 99.97   | 103.72  | 105.57  | 106.02  | 106.56  | 109.66  |

Note: ID = Network Identification; LC = Least Cost; NO = Non-Optimal.

**Table S19.** Standard deviation of diameter values for each design

| ID | Standard deviation (mm) |         |         |         |         |         |         |         |         |         |         |
|----|-------------------------|---------|---------|---------|---------|---------|---------|---------|---------|---------|---------|
|    | LC                      | NO1     | NO2     | NO3     | NO4     | NO5     | NO6     | NO7     | NO8     | NO9     | NO10    |
| 1  | 131.46                  | 145.56  | 139.08  | 143.52  | 181.65  | 149.81  | 126.59  | 142.23  | 170.52  | 137.79  | 216.57  |
| 2  | 43.95                   | 44.60   | 44.60   | 47.91   | 50.24   | 51.74   | 51.74   | 56.68   | 56.68   | 96.21   | 106.85  |
| 3  | 78.25                   | 77.84   | 77.84   | 79.78   | 83.51   | 122.08  | 116.44  | 140.53  | 210.03  | 216.60  | 232.62  |
| 4  | 225.08                  | 223.87  | 222.63  | 222.17  | 240.73  | 211.77  | 233.23  | 192.69  | 175.86  | 108.75  | 75.89   |
| 5  | 258.57                  | 254.39  | 262.01  | 237.95  | 246.10  | 247.96  | 233.99  | 252.69  | 245.94  | 242.09  | 234.68  |
| 6  | 66.37                   | 71.07   | 106.97  | 159.82  | 167.25  | 191.81  | 184.44  | 175.74  | 187.92  | 173.64  | 185.00  |
| 7  | 632.92                  | 1341.24 | 1440.17 | 1219.93 | 1112.12 | 1349.74 | 1280.75 | 1293.26 | 1144.05 | 1281.70 | 1248.95 |
| 8  | 160.65                  | 166.78  | 171.68  | 171.70  | 252.85  | 249.33  | 238.07  | 249.46  | 247.82  | 239.42  | 266.55  |
| 9  | 33.39                   | 33.32   | 86.63   | 0.00    | 107.67  | 93.79   | 123.88  | 112.34  | 137.00  | 131.74  | 147.02  |
| 10 | 56.53                   | 81.13   | 85.69   | 93.37   | 93.42   | 120.38  | 157.94  | 145.90  | 414.81  | 445.81  | 495.84  |
| 11 | 102.08                  | 95.34   | 117.77  | 163.27  | 186.31  | 204.13  | 193.27  | 184.71  | 203.51  | 208.26  | 250.48  |
| 12 | 87.48                   | 69.02   | 72.61   | 168.21  | 195.21  | 200.28  | 192.06  | 205.22  | 209.67  | 222.16  | 230.80  |
| 13 | 118.54                  | 115.77  | 118.80  | 119.01  | 123.44  | 125.35  | 127.73  | 125.41  | 129.68  | 127.71  | 129.40  |
| 14 | 3.63                    | 15.55   | 28.46   | 32.05   | 37.12   | 34.78   | 38.42   | 35.48   | 38.29   | 220.94  | 240.52  |
| 15 | 22.11                   | 22.20   | 29.40   | 38.04   | 38.04   | 38.38   | 38.38   | 38.38   | 195.39  | 207.22  | 231.86  |
| 16 | 28.47                   | 31.95   | 103.53  | 200.58  | 254.61  | 226.62  | 226.94  | 230.41  | 245.25  | 227.11  | 242.70  |
| 17 | 71.69                   | 72.74   | 73.18   | 72.62   | 72.12   | 71.54   | 91.94   | 93.58   | 93.20   | 210.49  | 224.40  |
| 18 | 0.00                    | 23.91   | 33.43   | 36.91   | 37.61   | 37.83   | 38.03   | 38.85   | 38.07   | 202.08  | 222.85  |
| 19 | 1.34                    | 4.92    | 7.63    | 29.28   | 33.24   | 33.70   | 36.32   | 37.92   | 38.07   | 38.76   | 235.21  |
| 20 | 15.94                   | 16.47   | 23.75   | 33.29   | 36.69   | 46.04   | 38.24   | 191.18  | 197.71  | 202.73  | 214.28  |
| 21 | 18.15                   | 18.69   | 25.21   | 38.52   | 37.51   | 38.11   | 38.11   | 39.29   | 126.02  | 149.46  | 231.24  |
| 22 | 9.80                    | 10.70   | 12.70   | 38.57   | 37.21   | 38.06   | 38.12   | 38.10   | 76.14   | 127.52  | 116.51  |
| 23 | 18.16                   | 18.74   | 25.33   | 30.13   | 32.99   | 36.48   | 37.98   | 38.13   | 40.78   | 218.04  | 209.18  |
| 24 | 12.55                   | 20.27   | 20.61   | 27.23   | 29.56   | 31.44   | 38.07   | 38.09   | 38.42   | 172.05  | 171.50  |
| 25 | 18.94                   | 21.03   | 38.68   | 40.86   | 59.74   | 93.04   | 109.03  | 189.10  | 180.53  | 209.84  | 221.84  |
| 26 | 4.11                    | 6.84    | 8.68    | 27.32   | 30.81   | 36.99   | 38.10   | 44.71   | 58.54   | 149.52  | 157.22  |
| 27 | 0.77                    | 5.47    | 20.22   | 36.40   | 38.05   | 38.02   | 38.08   | 64.71   | 143.27  | 226.49  | 230.19  |
| 28 | 9.75                    | 10.62   | 18.39   | 44.99   | 40.45   | 39.54   | 38.58   | 38.95   | 38.84   | 37.67   | 37.96   |

Note: ID = Network Identification; LC = Least Cost; NO = Non-Optimal.

**Table S20.** Fractal dimensions of the Hydraulic Gradient Surfaces

| ID | LC     | NO1    | NO2    | NO3    | NO4    | NO5    | NO6    | NO7    | NO8    | NO9    | NO10   |
|----|--------|--------|--------|--------|--------|--------|--------|--------|--------|--------|--------|
| 1  | 2.0333 | 1.9676 | 1.9947 | 1.9410 | 2.0290 | 1.9655 | 1.9578 | 2.0022 | 1.9595 | 1.9697 | 1.9895 |
| 2  | 2.1029 | 2.0441 | 2.0282 | 2.0629 | 2.0492 | 2.0569 | 2.0569 | 2.0574 | 2.0524 | 2.0148 | 2.0974 |
| 3  | 2.0723 | 2.0224 | 2.0322 | 2.0536 | 2.0353 | 2.0376 | 1.9637 | 2.0073 | 1.9975 | 2.0093 | 2.0012 |
| 4  | 2.1343 | 2.1358 | 2.1087 | 2.0542 | 2.0756 | 1.9787 | 1.9723 | 1.9667 | 1.9727 | 1.9775 | 1.9385 |
| 5  | 2.0214 | 2.0007 | 2.0232 | 2.0056 | 2.0045 | 1.9933 | 1.9967 | 2.0027 | 2.0022 | 1.9621 | 1.9713 |
| 6  | 2.3388 | 2.3165 | 2.2692 | 2.2581 | 2.2385 | 2.0044 | 2.3380 | 2.2035 | 2.1271 | 2.2319 | 1.9296 |
| 7  | 2.0381 | 2.0942 | 2.0847 | 2.0273 | 1.9581 | 2.1622 | 2.1598 | 2.0370 | 2.0772 | 2.0828 | 2.1289 |
| 8  | 2.0894 | 2.0891 | 2.0869 | 2.0872 | 2.0680 | 2.1332 | 2.1093 | 2.1136 | 2.1294 | 2.1312 | 2.0971 |
| 9  | 2.2121 | 2.2118 | 2.3674 | 2.0036 | 2.0877 | 2.0582 | 1.9762 | 2.0721 | 2.0324 | 2.0186 | 2.1720 |
| 10 | 2.0647 | 1.9869 | 2.0112 | 1.9725 | 2.0483 | 2.0404 | 2.1061 | 1.9947 | 1.9129 | 1.9290 | 1.9816 |
| 11 | 2.3125 | 2.3207 | 2.3426 | 2.2354 | 2.2641 | 2.2650 | 2.3186 | 2.2697 | 2.1792 | 2.2856 | 2.1773 |
| 12 | 2.3204 | 2.2662 | 2.3093 | 2.2883 | 2.2155 | 2.2014 | 2.2746 | 2.2003 | 2.2053 | 2.1965 | 2.2065 |
| 13 | 2.2982 | 2.2802 | 2.2563 | 2.2763 | 2.2917 | 2.2967 | 2.2945 | 2.3016 | 2.3058 | 2.3028 | 2.3024 |
| 14 | 2.0064 | 2.0060 | 2.0042 | 2.0054 | 1.9548 | 1.9290 | 1.9289 | 2.0638 | 2.0767 | 1.9490 | 2.1055 |
| 15 | 2.2110 | 2.2108 | 2.2111 | 2.2171 | 2.1860 | 2.2061 | 2.1618 | 2.1725 | 2.1076 | 2.1586 | 2.2162 |
| 16 | 1.9386 | 1.8812 | 1.9224 | 1.8420 | 1.8463 | 1.9101 | 1.9316 | 1.9885 | 2.0426 | 1.9040 | 1.9151 |
| 17 | 2.1754 | 2.1602 | 2.1594 | 2.1570 | 2.1577 | 2.1083 | 2.1626 | 2.1992 | 2.2078 | 2.1546 | 2.1551 |
| 18 | 2.0338 | 2.0536 | 2.0409 | 2.0603 | 2.0298 | 2.0593 | 2.0669 | 2.0786 | 2.0713 | 2.0839 | 1.9979 |
| 19 | 2.0703 | 2.0798 | 2.0613 | 2.0500 | 2.0512 | 2.0700 | 2.1532 | 2.1996 | 2.0266 | 2.0816 | 2.2853 |
| 20 | 2.1971 | 2.2001 | 2.2054 | 2.1974 | 2.1835 | 2.2384 | 2.2221 | 2.0891 | 2.2326 | 2.2047 | 2.1476 |
| 21 | 2.0617 | 2.0616 | 2.0628 | 2.1000 | 2.0708 | 2.0817 | 2.0510 | 2.0639 | 2.0550 | 2.1161 | 2.0831 |
| 22 | 2.1202 | 2.1171 | 2.1203 | 2.1342 | 2.1421 | 2.1057 | 2.0958 | 2.1129 | 2.1007 | 2.0885 | 2.0892 |
| 23 | 1.9283 | 1.9233 | 1.9462 | 1.9673 | 1.9454 | 1.9327 | 1.8858 | 1.6737 | 1.8206 | 1.8411 | 1.5216 |
| 24 | 2.1394 | 2.1307 | 2.1260 | 2.1350 | 2.1147 | 2.1250 | 2.1019 | 2.1322 | 2.0711 | 2.1126 | 2.1557 |
| 25 | 2.0852 | 2.0834 | 2.0690 | 2.0699 | 2.0706 | 2.0900 | 2.0705 | 2.0797 | 2.0854 | 2.0953 | 2.0877 |
| 26 | 2.0583 | 2.0606 | 2.0584 | 2.0418 | 2.0367 | 2.0365 | 2.0843 | 1.9789 | 2.0492 | 2.0215 | 1.9782 |
| 27 | 1.8622 | 1.8621 | 1.8469 | 1.9611 | 1.8006 | 2.0430 | 1.9929 | 1.8864 | 1.8876 | 2.0795 | 2.1691 |
| 28 | 2.0834 | 2.0821 | 2.0844 | 2.0820 | 2.0800 | 2.0803 | 2.0831 | 2.0829 | 2.0833 | 2.0829 | 2.0841 |

Note: ID = Network Identification; LC = Least Cost; NO = Non-Optimal.

**Table S21.** Coefficients of determination in fractal analysis of Hydraulic Gradient Surfaces

| ID | LC   | NO1  | NO2  | NO3  | NO4  | NO5  | NO6  | NO7  | NO8  | NO9  | NO10 |
|----|------|------|------|------|------|------|------|------|------|------|------|
| 1  | 1.00 | 1.00 | 1.00 | 1.00 | 1.00 | 1.00 | 1.00 | 1.00 | 1.00 | 1.00 | 1.00 |
| 2  | 1.00 | 1.00 | 1.00 | 0.99 | 1.00 | 1.00 | 1.00 | 1.00 | 0.99 | 1.00 | 0.99 |
| 3  | 1.00 | 1.00 | 1.00 | 1.00 | 1.00 | 1.00 | 1.00 | 1.00 | 1.00 | 1.00 | 1.00 |
| 4  | 1.00 | 1.00 | 1.00 | 1.00 | 1.00 | 1.00 | 1.00 | 1.00 | 1.00 | 1.00 | 1.00 |
| 5  | 1.00 | 1.00 | 1.00 | 1.00 | 1.00 | 1.00 | 1.00 | 1.00 | 1.00 | 1.00 | 1.00 |
| 6  | 0.98 | 0.99 | 0.99 | 0.99 | 0.99 | 0.99 | 0.96 | 0.98 | 1.00 | 0.99 | 0.96 |
| 7  | 1.00 | 1.00 | 1.00 | 1.00 | 1.00 | 1.00 | 1.00 | 1.00 | 1.00 | 1.00 | 1.00 |
| 8  | 1.00 | 1.00 | 1.00 | 1.00 | 1.00 | 0.99 | 0.99 | 1.00 | 1.00 | 1.00 | 1.00 |
| 9  | 0.97 | 0.97 | 0.95 | 1.00 | 0.99 | 1.00 | 1.00 | 1.00 | 0.99 | 1.00 | 0.99 |
| 10 | 1.00 | 1.00 | 1.00 | 1.00 | 0.99 | 0.99 | 0.99 | 0.99 | 1.00 | 1.00 | 1.00 |
| 11 | 0.96 | 0.96 | 0.95 | 1.00 | 0.99 | 0.98 | 0.98 | 1.00 | 0.99 | 1.00 | 1.00 |
| 12 | 0.96 | 0.97 | 0.96 | 0.97 | 0.99 | 0.99 | 0.98 | 0.99 | 0.99 | 1.00 | 1.00 |
| 13 | 0.99 | 0.99 | 0.99 | 0.99 | 0.99 | 0.99 | 0.99 | 0.99 | 0.99 | 0.99 | 0.99 |
| 14 | 1.00 | 1.00 | 1.00 | 1.00 | 1.00 | 1.00 | 1.00 | 0.99 | 1.00 | 1.00 | 0.99 |
| 15 | 0.97 | 0.97 | 0.97 | 0.96 | 0.98 | 0.97 | 0.98 | 0.98 | 0.98 | 0.97 | 0.96 |
| 16 | 1.00 | 1.00 | 1.00 | 1.00 | 1.00 | 1.00 | 1.00 | 1.00 | 1.00 | 1.00 | 1.00 |
| 17 | 0.99 | 1.00 | 1.00 | 1.00 | 1.00 | 1.00 | 0.99 | 0.99 | 0.99 | 1.00 | 0.99 |
| 18 | 1.00 | 1.00 | 1.00 | 1.00 | 1.00 | 1.00 | 1.00 | 1.00 | 1.00 | 1.00 | 0.99 |
| 19 | 0.98 | 0.99 | 0.98 | 0.98 | 0.98 | 0.98 | 0.98 | 0.99 | 0.99 | 0.99 | 0.98 |
| 20 | 0.97 | 0.97 | 0.97 | 0.97 | 0.98 | 0.96 | 0.97 | 0.99 | 0.96 | 0.97 | 0.99 |
| 21 | 1.00 | 1.00 | 1.00 | 1.00 | 1.00 | 1.00 | 1.00 | 1.00 | 1.00 | 1.00 | 1.00 |
| 22 | 1.00 | 1.00 | 1.00 | 1.00 | 1.00 | 1.00 | 0.99 | 1.00 | 1.00 | 1.00 | 1.00 |
| 23 | 0.99 | 0.99 | 1.00 | 1.00 | 1.00 | 1.00 | 0.99 | 0.99 | 0.99 | 0.99 | 0.99 |
| 24 | 0.98 | 0.98 | 0.98 | 0.98 | 0.98 | 0.98 | 0.98 | 0.98 | 0.98 | 0.98 | 0.97 |
| 25 | 0.99 | 0.99 | 0.98 | 0.98 | 0.98 | 0.97 | 0.99 | 1.00 | 0.96 | 1.00 | 0.97 |
| 26 | 0.92 | 0.92 | 0.92 | 0.90 | 0.89 | 0.89 | 0.94 | 0.88 | 0.92 | 0.91 | 0.83 |
| 27 | 0.99 | 0.99 | 0.99 | 1.00 | 0.99 | 1.00 | 1.00 | 0.99 | 0.99 | 1.00 | 1.00 |
| 28 | 1.00 | 1.00 | 1.00 | 1.00 | 1.00 | 1.00 | 1.00 | 1.00 | 1.00 | 1.00 | 1.00 |

Note: ID = Network Identification; LC = Least Cost; NO = Non-Optimal.

**Table S22.** Fractal dimension of the non-optimal networks by the flow criterion

| ID | NO1    | NO2    | NO3    | NO4    | NO5    | NO6    | NO7    | NO8    | NO9    | NO10   |
|----|--------|--------|--------|--------|--------|--------|--------|--------|--------|--------|
| 1  | 0.9428 | 0.9428 | 0.9342 | 1.0977 | 0.9221 | 0.9221 | 0.9428 | 0.9342 | 0.9221 | 0.9221 |
| 2  | 0.9311 | 1.0517 | 0.9311 | 1.0517 | 1.0317 | 1.0317 | 0.9311 | 1.0317 | 1.0517 | 1.0517 |
| 3  | 1.0963 | 1.1126 | 1.0773 | 1.1126 | 1.0963 | 1.1126 | 1.1126 | 1.0963 | 1.0745 | 1.0963 |
| 4  | 1.1686 | 1.1686 | 1.1686 | 1.2088 | 1.1686 | 1.1538 | 1.1538 | 1.1686 | 1.1686 | 1.1686 |
| 5  | 1.0698 | 1.0698 | 1.0605 | 1.0605 | 1.0698 | 1.0698 | 1.0605 | 1.0605 | 1.0794 | 1.0794 |
| 6  | 1.4307 | 1.4086 | 1.2537 | 1.4185 | 1.4391 | 1.4086 | 1.3978 | 1.2537 | 1.4307 | 1.4086 |
| 7  | 1.0458 | 1.0524 | 1.0524 | 1.0524 | 1.0524 | 0.9312 | 1.0524 | 0.9368 | 1.0458 | 1.0524 |
| 8  | 1.0899 | 1.0899 | 1.0899 | 1.0899 | 1.0794 | 1.0734 | 1.0839 | 1.0839 | 1.3098 | 1.0839 |
| 9  | 1.2940 | 1.3006 | 1.2860 | 1.2760 | 1.2760 | 1.2940 | 1.2860 | 1.2796 | 1.2840 | 1.3039 |
| 10 | 1.2700 | 1.2559 | 1.2559 | 1.2944 | 1.2944 | 1.2285 | 1.2652 | 1.2917 | 1.1807 | 1.2700 |
| 11 | 0.9307 | 0.9602 | 0.9733 | 1.0346 | 1.0354 | 0.9685 | 0.9770 | 0.9936 | 0.9941 | 0.9436 |
| 12 | 1.1946 | 1.2232 | 1.1962 | 1.2085 | 1.2078 | 1.2283 | 1.2055 | 1.1916 | 1.1956 | 1.2095 |
| 13 | 0.5710 | 0.5696 | 0.5724 | 0.5717 | 0.5717 | 0.5717 | 0.5728 | 0.5727 | 0.5717 | 0.5717 |
| 14 | 1.1575 | 1.1575 | 1.1542 | 1.1575 | 1.1575 | 1.1542 | 1.1575 | 1.1575 | 1.1575 | 1.1575 |
| 15 | 1.2443 | 1.2443 | 1.2443 | 1.2443 | 1.2443 | 1.2443 | 1.2443 | 1.2443 | 1.2443 | 1.2443 |
| 16 | 0.6192 | 0.6192 | 0.6192 | 0.6192 | 0.6192 | 0.6192 | 0.6192 | 0.6192 | 0.6192 | 0.6192 |
| 17 | 1.2428 | 1.2428 | 1.2397 | 1.2428 | 1.1536 | 1.2397 | 1.2397 | 1.2431 | 1.2398 | 1.2412 |
| 18 | 0.9649 | 0.9393 | 0.9830 | 0.9594 | 0.9639 | 0.9726 | 0.9696 | 0.9734 | 0.9983 | 0.9833 |
| 19 | 1.3054 | 1.3146 | 1.3006 | 1.3001 | 1.3001 | 1.3078 | 1.2991 | 1.2881 | 1.3363 | 1.2794 |
| 20 | 1.1180 | 1.1182 | 1.1180 | 1.1141 | 1.1230 | 1.1314 | 1.1181 | 1.1430 | 1.1213 | 1.1253 |
| 21 | 1.1863 | 1.1909 | 1.1899 | 1.1880 | 1.2051 | 1.1758 | 1.1991 | 1.2674 | 1.2509 | 1.2635 |
| 22 | 1.0582 | 1.0781 | 1.1246 | 1.0462 | 1.0720 | 1.1318 | 1.0317 | 1.1276 | 1.1186 | 1.0371 |
| 23 | 1.2084 | 1.1887 | 1.1927 | 1.1717 | 1.1961 | 1.1958 | 1.1993 | 1.1793 | 1.1963 | 1.1822 |
| 24 | 1.2518 | 1.2615 | 1.2311 | 1.2382 | 1.2279 | 1.2451 | 1.2051 | 1.2222 | 1.2376 | 1.2391 |
| 25 | 0.4647 | 0.4530 | 0.4279 | 0.4153 | 0.4152 | 0.4167 | 0.4249 | 0.4171 | 0.4172 | 0.4162 |
| 26 | 0.4027 | 0.4030 | 0.4028 | 0.4027 | 0.4023 | 0.4023 | 0.4032 | 0.4033 | 0.4030 | 0.4030 |
| 27 | 1.4489 | 1.4616 | 1.4637 | 1.4941 | 1.4614 | 1.4515 | 1.4757 | 1.5086 | 1.5239 | 1.5009 |
| 28 | 1.0871 | 1.0903 | 1.0948 | 1.1059 | 1.1029 | 1.1072 | 1.1706 | 1.1795 | 1.1089 | 1.1184 |

Note: ID = Network Identification; NO = Non-Optimal.

**Table S23.** Coefficients of determination in fractal analysis of networks by the flow criterion

| ID | NO1  | NO2  | NO3  | NO4  | NO5  | NO6  | NO7  | NO8  | NO9  | NO10 |
|----|------|------|------|------|------|------|------|------|------|------|
| 1  | 0.90 | 0.90 | 0.96 | 0.81 | 0.94 | 0.94 | 0.90 | 0.96 | 0.94 | 0.94 |
| 2  | 0.96 | 0.95 | 0.96 | 0.95 | 0.95 | 0.95 | 0.96 | 0.95 | 0.95 | 0.95 |
| 3  | 0.96 | 0.96 | 0.97 | 0.96 | 0.96 | 0.96 | 0.96 | 0.96 | 0.96 | 0.96 |
| 4  | 0.96 | 0.96 | 0.96 | 0.94 | 0.96 | 0.96 | 0.96 | 0.96 | 0.96 | 0.96 |
| 5  | 0.97 | 0.97 | 0.97 | 0.97 | 0.97 | 0.97 | 0.97 | 0.97 | 0.96 | 0.96 |
| 6  | 0.95 | 0.95 | 0.94 | 0.94 | 0.94 | 0.95 | 0.95 | 0.94 | 0.95 | 0.95 |
| 7  | 0.95 | 0.96 | 0.96 | 0.96 | 0.96 | 0.95 | 0.96 | 0.96 | 0.95 | 0.96 |
| 8  | 0.97 | 0.97 | 0.97 | 0.97 | 0.97 | 0.96 | 0.96 | 0.96 | 0.96 | 0.96 |
| 9  | 0.97 | 0.97 | 0.97 | 0.97 | 0.97 | 0.97 | 0.97 | 0.98 | 0.98 | 0.96 |
| 10 | 0.96 | 0.97 | 0.97 | 0.95 | 0.95 | 0.97 | 0.96 | 0.98 | 0.97 | 0.96 |
| 11 | 0.88 | 0.82 | 0.89 | 0.82 | 0.86 | 0.89 | 0.85 | 0.85 | 0.85 | 0.78 |
| 12 | 0.98 | 0.99 | 0.98 | 0.97 | 0.97 | 0.96 | 0.97 | 0.97 | 0.98 | 0.97 |
| 13 | 0.99 | 0.99 | 0.99 | 0.99 | 0.99 | 0.99 | 0.99 | 0.99 | 0.99 | 0.99 |
| 14 | 0.96 | 0.96 | 0.96 | 0.96 | 0.96 | 0.96 | 0.96 | 0.96 | 0.96 | 0.96 |
| 15 | 0.97 | 0.97 | 0.97 | 0.97 | 0.97 | 0.97 | 0.97 | 0.97 | 0.97 | 0.97 |
| 16 | 0.36 | 0.36 | 0.36 | 0.36 | 0.36 | 0.36 | 0.36 | 0.36 | 0.36 | 0.36 |
| 17 | 0.97 | 0.97 | 0.98 | 0.97 | 0.97 | 0.98 | 0.98 | 0.97 | 0.97 | 0.97 |
| 18 | 1.00 | 0.99 | 1.00 | 0.98 | 0.99 | 0.99 | 0.99 | 1.00 | 0.99 | 0.99 |
| 19 | 0.95 | 0.96 | 0.94 | 0.94 | 0.94 | 0.95 | 0.94 | 0.92 | 0.94 | 0.95 |
| 20 | 0.98 | 0.98 | 0.98 | 0.97 | 0.97 | 0.97 | 0.98 | 0.97 | 0.98 | 0.98 |
| 21 | 0.93 | 0.93 | 0.92 | 0.92 | 0.93 | 0.92 | 0.93 | 0.90 | 0.90 | 0.90 |
| 22 | 0.93 | 0.97 | 0.99 | 0.96 | 0.89 | 0.98 | 0.93 | 0.98 | 0.98 | 0.89 |
| 23 | 1.00 | 0.99 | 1.00 | 1.00 | 0.99 | 1.00 | 0.99 | 1.00 | 1.00 | 1.00 |
| 24 | 0.98 | 0.98 | 0.97 | 0.99 | 0.97 | 0.98 | 0.97 | 0.97 | 0.97 | 0.98 |
| 25 | 0.99 | 0.99 | 0.99 | 0.99 | 0.99 | 0.99 | 0.98 | 0.99 | 0.99 | 0.99 |
| 26 | 0.98 | 0.98 | 0.98 | 0.98 | 0.99 | 0.99 | 0.99 | 0.98 | 0.99 | 0.98 |
| 27 | 0.99 | 1.00 | 0.99 | 0.98 | 0.99 | 0.98 | 0.99 | 0.97 | 0.99 | 0.99 |
| 28 | 1.00 | 1.00 | 1.00 | 0.99 | 0.99 | 0.99 | 0.97 | 0.98 | 0.99 | 0.97 |

Note: ID = Network Identification; NO = Non-Optimal.

**Table S24.** Fractal dimension of the non-optimal networks by the energy criterion

| ID | NO1    | NO2    | NO3    | NO4    | NO5    | NO6    | NO7    | NO8    | NO9    | NO10   |
|----|--------|--------|--------|--------|--------|--------|--------|--------|--------|--------|
| 1  | 1.1394 | 1.1981 | 1.1981 | 1.1394 | 1.1394 | 1.1394 | 1.1981 | 1.1981 | 1.1981 | 1.1981 |
| 2  | 1.2386 | 1.2386 | 1.2386 | 1.2386 | 1.2386 | 1.2386 | 1.2386 | 1.2319 | 1.2319 | 1.2386 |
| 3  | 1.2768 | 1.2768 | 1.2768 | 1.2768 | 1.2768 | 1.2768 | 1.2768 | 1.2768 | 1.2768 | 1.2768 |
| 4  | 1.3755 | 1.3755 | 1.3853 | 1.3944 | 1.3755 | 1.3755 | 1.3755 | 1.3755 | 1.3755 | 1.3755 |
| 5  | 1.2042 | 1.2107 | 1.2042 | 1.2042 | 1.2042 | 1.2042 | 1.1998 | 1.1998 | 1.2107 | 1.2107 |
| 6  | 1.4158 | 1.4158 | 1.4158 | 1.4158 | 1.4158 | 1.4158 | 1.4158 | 1.4158 | 1.4059 | 1.4158 |
| 7  | 1.0469 | 1.0469 | 1.0617 | 1.0469 | 1.0535 | 1.0389 | 1.0683 | 1.0469 | 1.0617 | 1.0683 |
| 8  | 1.3018 | 1.3018 | 1.3018 | 1.3018 | 1.3018 | 1.3018 | 1.3018 | 1.3018 | 1.3018 | 1.3018 |
| 9  | 1.4495 | 1.4435 | 1.4396 | 1.4396 | 1.4396 | 1.4396 | 1.4396 | 1.4396 | 1.4396 | 1.4396 |
| 10 | 1.3114 | 1.3169 | 1.3250 | 1.3114 | 1.3114 | 1.3275 | 1.3549 | 1.3289 | 1.3468 | 1.3340 |
| 11 | 0.6074 | 0.6074 | 0.6045 | 0.6089 | 0.5961 | 0.6002 | 0.6014 | 0.6012 | 0.5956 | 0.5979 |
| 12 | 1.2588 | 1.2596 | 1.2588 | 1.2322 | 1.2362 | 1.2482 | 1.2370 | 1.2362 | 1.2378 | 1.2378 |
| 13 | 0.5816 | 0.5877 | 0.5823 | 0.5877 | 0.5877 | 0.5864 | 0.5820 | 0.5819 | 0.5819 | 0.5819 |
| 14 | 1.1274 | 1.1071 | 1.1071 | 1.1071 | 1.1274 | 1.1071 | 1.1274 | 1.1071 | 1.1274 | 1.1274 |
| 15 | 1.2163 | 1.2163 | 1.2163 | 1.2256 | 1.2163 | 1.2163 | 1.2210 | 1.2256 | 1.2256 | 1.2210 |
| 16 | 0.1120 | 0.1120 | 0.1086 | 0.1120 | 0.1086 | 0.1120 | 0.1141 | 0.1120 | 0.1120 | 0.1141 |
| 17 | 1.1673 | 1.1673 | 1.1673 | 1.1673 | 1.1673 | 1.1652 | 1.1673 | 1.1652 | 1.1694 | 1.1742 |
| 18 | 1.0102 | 1.0117 | 1.0111 | 1.0129 | 1.0192 | 1.0392 | 1.0219 | 1.0111 | 1.0016 | 1.0373 |
| 19 | 1.2747 | 1.2747 | 1.2747 | 1.2747 | 1.2747 | 1.2747 | 1.2747 | 1.2554 | 1.2747 | 1.2747 |
| 20 | 1.1541 | 1.1541 | 1.1541 | 1.1541 | 1.1658 | 1.1658 | 1.1519 | 1.1660 | 1.1912 | 1.1658 |
| 21 | 1.1830 | 1.1830 | 1.1809 | 1.1830 | 1.1831 | 1.1830 | 1.1872 | 1.1830 | 1.1811 | 1.1830 |
| 22 | 1.2307 | 1.2351 | 1.2353 | 1.2250 | 1.2239 | 1.2297 | 1.2353 | 1.2307 | 1.2254 | 1.2309 |
| 23 | 1.2441 | 1.2441 | 1.2441 | 1.2455 | 1.2441 | 1.2441 | 1.2441 | 1.2441 | 1.2441 | 1.2410 |
| 24 | 1.3435 | 1.3435 | 1.3435 | 1.3435 | 1.3435 | 1.3435 | 1.3435 | 1.3435 | 1.3475 | 1.3435 |
| 25 | 0.4190 | 0.4186 | 0.4186 | 0.4186 | 0.4188 | 0.4192 | 0.4188 | 0.4188 | 0.4184 | 0.4188 |
| 26 | 0.2041 | 0.2041 | 0.2041 | 0.2041 | 0.2041 | 0.2042 | 0.2042 | 0.2042 | 0.2041 | 0.2041 |
| 27 | 1.4882 | 1.4882 | 1.4522 | 1.4522 | 1.4648 | 1.4522 | 1.4522 | 1.4522 | 1.4522 | 1.4522 |
| 28 | 1.1352 | 1.1321 | 1.1321 | 1.1321 | 1.1352 | 1.1321 | 1.1321 | 1.1321 | 1.1321 | 1.1352 |

Note: ID = Network Identification; NO = Non-Optimal.

**Table S25.** Coefficients of determination in fractal analysis of networks by the energy criterion

| ID | NO1  | NO2  | NO3  | NO4  | NO5  | NO6  | NO7  | NO8  | NO9  | NO10 |
|----|------|------|------|------|------|------|------|------|------|------|
| 1  | 0.92 | 1.00 | 1.00 | 0.92 | 0.92 | 0.92 | 1.00 | 1.00 | 1.00 | 1.00 |
| 2  | 0.95 | 0.95 | 0.95 | 0.95 | 0.95 | 0.95 | 0.95 | 0.98 | 0.98 | 0.95 |
| 3  | 0.96 | 0.96 | 0.96 | 0.96 | 0.96 | 0.96 | 0.96 | 0.96 | 0.96 | 0.96 |
| 4  | 0.96 | 0.96 | 0.95 | 0.94 | 0.96 | 0.96 | 0.96 | 0.96 | 0.96 | 0.96 |
| 5  | 0.97 | 0.97 | 0.97 | 0.97 | 0.97 | 0.97 | 0.97 | 0.97 | 0.97 | 0.97 |
| 6  | 0.93 | 0.93 | 0.93 | 0.93 | 0.93 | 0.93 | 0.93 | 0.93 | 0.93 | 0.93 |
| 7  | 0.94 | 0.94 | 0.94 | 0.94 | 0.93 | 0.95 | 0.93 | 0.94 | 0.94 | 0.93 |
| 8  | 0.97 | 0.97 | 0.97 | 0.97 | 0.97 | 0.97 | 0.97 | 0.97 | 0.97 | 0.97 |
| 9  | 0.97 | 0.98 | 0.97 | 0.97 | 0.97 | 0.97 | 0.97 | 0.97 | 0.97 | 0.97 |
| 10 | 0.96 | 0.95 | 0.96 | 0.96 | 0.96 | 0.95 | 0.95 | 0.96 | 0.97 | 0.97 |
| 11 | 0.96 | 0.96 | 0.96 | 0.96 | 0.95 | 0.96 | 0.96 | 0.95 | 0.95 | 0.96 |
| 12 | 0.99 | 0.98 | 0.99 | 0.98 | 0.99 | 0.99 | 0.99 | 0.99 | 0.99 | 0.99 |
| 13 | 0.99 | 0.99 | 0.99 | 0.99 | 0.99 | 0.99 | 0.99 | 0.99 | 0.99 | 0.99 |
| 14 | 0.97 | 0.97 | 0.97 | 0.97 | 0.97 | 0.97 | 0.97 | 0.97 | 0.97 | 0.97 |
| 15 | 0.97 | 0.97 | 0.97 | 0.97 | 0.97 | 0.97 | 0.97 | 0.97 | 0.97 | 0.97 |
| 16 | 0.98 | 0.98 | 0.97 | 0.98 | 0.97 | 0.98 | 0.99 | 0.98 | 0.98 | 0.99 |
| 17 | 0.95 | 0.95 | 0.95 | 0.95 | 0.95 | 0.95 | 0.95 | 0.95 | 0.95 | 0.96 |
| 18 | 0.99 | 0.99 | 0.99 | 0.99 | 0.99 | 0.98 | 0.99 | 0.99 | 0.99 | 0.99 |
| 19 | 0.97 | 0.97 | 0.97 | 0.97 | 0.97 | 0.97 | 0.97 | 0.97 | 0.97 | 0.97 |
| 20 | 0.99 | 0.99 | 0.99 | 0.99 | 0.98 | 0.98 | 0.99 | 0.98 | 0.98 | 0.98 |
| 21 | 0.99 | 0.99 | 0.98 | 0.99 | 0.98 | 0.99 | 0.99 | 0.99 | 0.98 | 0.99 |
| 22 | 0.98 | 0.98 | 0.98 | 0.97 | 0.97 | 0.97 | 0.98 | 0.98 | 0.97 | 0.97 |
| 23 | 1.00 | 1.00 | 1.00 | 1.00 | 1.00 | 1.00 | 1.00 | 1.00 | 1.00 | 1.00 |
| 24 | 0.99 | 0.99 | 0.99 | 0.99 | 0.99 | 0.99 | 0.99 | 0.99 | 1.00 | 0.99 |
| 25 | 0.99 | 0.99 | 0.99 | 0.99 | 0.99 | 0.99 | 0.99 | 0.99 | 0.99 | 0.99 |
| 26 | 0.98 | 0.98 | 0.98 | 0.98 | 0.98 | 0.98 | 0.98 | 0.98 | 0.98 | 0.98 |
| 27 | 1.00 | 1.00 | 0.99 | 0.99 | 1.00 | 0.99 | 0.99 | 0.99 | 0.99 | 0.99 |
| 28 | 0.99 | 0.99 | 0.99 | 0.99 | 0.99 | 0.99 | 0.99 | 0.99 | 0.99 | 0.99 |

Note: ID = Network Identification; NO = Non-Optimal.



**Table S26.** Fractal dimension of the non-optimal network by the infrastructural criterion

| ID | NO1    | NO2    | NO3    | NO4    | NO5    | NO6    | NO7    | NO8    | NO9    | NO10   |
|----|--------|--------|--------|--------|--------|--------|--------|--------|--------|--------|
| 1  | 1.0977 | 1.0977 | 0.9221 | 1.0977 | 1.0977 | 1.0977 | 1.1394 | 1.1394 | 1.1981 | 0.9221 |
| 2  | 1.0317 | 0.9382 | 0.9382 | 0.9382 | 0.9382 | 0.9382 | 0.9382 | 1.0317 | 0.9382 | 0.9635 |
| 3  | 1.2768 | 1.2996 | 1.2996 | 1.1996 | 1.2224 | 1.2224 | 1.2907 | 1.2768 | 1.1368 | 1.2224 |
| 4  | 1.2517 | 1.2517 | 1.2890 | 1.2890 | 1.2890 | 1.3815 | 1.3815 | 1.3905 | 1.3944 | 1.3944 |
| 5  | 1.2142 | 1.2142 | 1.2173 | 1.2173 | 1.2274 | 1.2173 | 1.2274 | 1.2274 | 1.2274 | 1.2173 |
| 6  | 1.3346 | 1.4391 | 1.4135 | 1.4185 | 1.3978 | 1.4158 | 1.2327 | 1.4158 | 1.3401 | 1.4216 |
| 7  | 1.0376 | 1.0617 | 1.0444 | 1.0444 | 1.0535 | 1.0442 | 1.0469 | 1.0444 | 1.0296 | 1.0524 |
| 8  | 1.3073 | 1.3073 | 1.3048 | 1.3073 | 1.2893 | 1.3048 | 1.1934 | 1.2893 | 1.3000 | 1.2438 |
| 9  | 1.4495 | 1.3508 | 1.4670 | 1.4495 | 1.4586 | 1.4586 | 1.4495 | 1.4495 | 1.3841 | 1.3841 |
| 10 | 1.3114 | 1.3169 | 1.3250 | 1.3114 | 1.3114 | 1.3275 | 1.3549 | 1.3289 | 1.3468 | 1.3340 |
| 11 | 0.8540 | 0.9676 | 0.9432 | 0.9949 | 0.9780 | 0.9224 | 0.9390 | 0.9777 | 0.9267 | 0.9807 |
| 12 | 1.2653 | 1.2168 | 1.2335 | 1.2466 | 1.2424 | 1.2271 | 1.2473 | 1.2553 | 1.2634 | 1.2546 |
| 13 | 0.5806 | 0.5816 | 0.5796 | 0.5787 | 0.5787 | 0.5787 | 0.5799 | 0.5796 | 0.5744 | 0.5744 |
| 14 | 1.1244 | 1.0938 | 1.0842 | 1.1077 | 1.0900 | 1.1089 | 1.1150 | 1.1284 | 1.1285 | 1.1234 |
| 15 | 1.1961 | 1.1855 | 1.1998 | 1.2101 | 1.1835 | 1.1965 | 1.2018 | 1.2636 | 1.1904 | 1.2094 |
| 16 | 0.5293 | 0.4280 | 0.6558 | 0.5982 | 0.5098 | 0.6534 | 0.6192 | 0.6537 | 0.6534 | 0.4855 |
| 17 | 1.1407 | 1.1427 | 1.1426 | 1.1567 | 1.1552 | 1.1083 | 1.1037 | 1.0961 | 1.2030 | 1.1972 |
| 18 | 1.0280 | 0.9856 | 0.9743 | 0.9907 | 0.9808 | 0.9822 | 0.9994 | 0.9805 | 1.0133 | 0.9833 |
| 19 | 1.2337 | 1.2335 | 1.3118 | 1.3286 | 1.3276 | 1.2287 | 1.3177 | 1.2374 | 1.2620 | 1.2694 |
| 20 | 1.1456 | 1.1307 | 1.1477 | 1.1403 | 1.1623 | 1.1573 | 1.0615 | 1.1432 | 1.1453 | 1.1124 |
| 21 | 1.1345 | 1.1796 | 1.1608 | 1.1612 | 1.1574 | 1.1479 | 1.1518 | 1.1852 | 1.1642 | 1.1880 |
| 22 | 1.1751 | 1.1644 | 1.1760 | 1.2238 | 1.2573 | 1.2112 | 1.2318 | 1.1752 | 1.2270 | 1.1517 |
| 23 | 1.2167 | 1.2092 | 1.2065 | 1.2224 | 1.2095 | 1.2174 | 1.2278 | 1.2084 | 1.2131 | 1.1898 |
| 24 | 1.3376 | 1.2896 | 1.2907 | 1.3141 | 1.3347 | 1.2966 | 1.3295 | 1.2851 | 1.2736 | 1.2403 |
| 25 | 0.4176 | 0.4168 | 0.4163 | 0.4151 | 0.4167 | 0.4175 | 0.4157 | 0.4191 | 0.4125 | 0.4152 |
| 26 | 0.2042 | 0.2041 | 0.2040 | 0.2040 | 0.2042 | 0.2040 | 0.2043 | 0.2038 | 0.2036 | 0.2036 |
| 27 | 1.4547 | 1.4533 | 1.4533 | 1.4549 | 1.4426 | 1.4426 | 1.4337 | 1.4398 | 1.4459 | 1.4588 |
| 28 | 1.1115 | 1.1178 | 1.1065 | 1.1182 | 1.1094 | 1.1012 | 1.1068 | 1.0936 | 1.1162 | 1.1043 |

Note: ID = Network Identification; NO = Non-Optimal.

**Table S27.** Coefficients of determination in fractal analysis of networks by the infrastructural criterion

| ID | NO1  | NO2  | NO3  | NO4  | NO5  | NO6  | NO7  | NO8  | NO9  | NO10 |
|----|------|------|------|------|------|------|------|------|------|------|
| 1  | 0.81 | 0.81 | 0.94 | 0.81 | 0.81 | 0.81 | 0.92 | 0.92 | 1.00 | 0.94 |
| 2  | 0.95 | 0.94 | 0.94 | 0.94 | 0.94 | 0.94 | 0.94 | 0.95 | 0.94 | 0.94 |
| 3  | 0.96 | 0.98 | 0.98 | 0.92 | 0.93 | 0.93 | 0.95 | 0.96 | 0.96 | 0.93 |
| 4  | 0.95 | 0.95 | 0.95 | 0.95 | 0.95 | 0.94 | 0.94 | 0.94 | 0.94 | 0.94 |
| 5  | 0.97 | 0.97 | 0.97 | 0.97 | 0.97 | 0.97 | 0.97 | 0.97 | 0.97 | 0.97 |
| 6  | 0.95 | 0.94 | 0.91 | 0.94 | 0.95 | 0.93 | 0.95 | 0.93 | 0.93 | 0.95 |
| 7  | 0.96 | 0.94 | 0.96 | 0.96 | 0.93 | 0.95 | 0.94 | 0.96 | 0.97 | 0.96 |
| 8  | 0.96 | 0.96 | 0.97 | 0.96 | 0.96 | 0.97 | 0.98 | 0.96 | 0.96 | 0.98 |
| 9  | 0.97 | 0.98 | 0.96 | 0.97 | 0.96 | 0.96 | 0.97 | 0.97 | 0.97 | 0.97 |
| 10 | 0.96 | 0.95 | 0.96 | 0.96 | 0.96 | 0.95 | 0.95 | 0.96 | 0.97 | 0.97 |
| 11 | 0.80 | 0.85 | 0.89 | 0.86 | 0.84 | 0.88 | 0.81 | 0.85 | 0.78 | 0.85 |
| 12 | 0.97 | 0.99 | 0.99 | 0.98 | 0.97 | 0.98 | 0.98 | 0.97 | 0.98 | 0.98 |
| 13 | 1.00 | 0.99 | 0.99 | 0.99 | 1.00 | 1.00 | 0.99 | 0.99 | 0.99 | 0.99 |
| 14 | 0.94 | 0.93 | 0.91 | 0.95 | 0.93 | 0.94 | 0.95 | 0.96 | 0.91 | 0.96 |
| 15 | 0.94 | 0.95 | 0.94 | 0.95 | 0.94 | 0.94 | 0.92 | 0.96 | 0.93 | 0.96 |
| 16 | 0.27 | 0.21 | 0.30 | 0.36 | 0.26 | 0.29 | 0.36 | 0.30 | 0.65 | 0.23 |
| 17 | 0.92 | 0.92 | 0.92 | 0.92 | 0.92 | 0.91 | 0.91 | 0.91 | 0.96 | 0.95 |
| 18 | 0.98 | 0.99 | 1.00 | 0.99 | 0.99 | 0.99 | 0.99 | 0.99 | 0.98 | 0.99 |
| 19 | 0.96 | 0.96 | 0.92 | 0.92 | 0.92 | 0.95 | 0.93 | 0.98 | 0.97 | 0.93 |
| 20 | 0.98 | 0.98 | 0.98 | 0.98 | 0.97 | 0.98 | 0.99 | 0.98 | 0.98 | 0.98 |
| 21 | 0.97 | 0.97 | 0.97 | 0.97 | 0.97 | 0.98 | 0.97 | 0.93 | 0.98 | 0.94 |
| 22 | 0.97 | 0.98 | 0.98 | 0.95 | 0.95 | 0.96 | 0.96 | 0.97 | 0.97 | 0.98 |
| 23 | 1.00 | 0.99 | 1.00 | 0.99 | 1.00 | 1.00 | 1.00 | 1.00 | 1.00 | 1.00 |
| 24 | 1.00 | 0.96 | 0.98 | 0.98 | 0.99 | 0.99 | 0.97 | 0.98 | 0.97 | 0.97 |
| 25 | 0.99 | 0.99 | 0.99 | 0.99 | 0.99 | 0.99 | 0.99 | 0.99 | 0.99 | 0.99 |
| 26 | 0.98 | 0.99 | 0.98 | 0.98 | 0.98 | 0.99 | 0.98 | 0.99 | 0.98 | 0.98 |
| 27 | 0.98 | 0.99 | 0.99 | 0.99 | 0.99 | 0.99 | 0.99 | 0.97 | 0.99 | 0.99 |
| 28 | 1.00 | 0.99 | 1.00 | 0.99 | 1.00 | 0.99 | 1.00 | 1.00 | 1.00 | 0.99 |

Note: ID = Network Identification; NO = Non-Optimal.
